# Constructive Connectomics: how neuronal axons get from here to there using gene-expression maps derived from their family trees

Stan Kerstjens, Gabriela Michel<sup>†</sup> and Rodney J. Douglas

Institute of Neuroinformatics, UZH and ETH Zurich, Switzerland

February 26, 2022

1

## Abstract

2

3

4

5

6

7

8

9

10

11

12

13

14

15

16

17

18

During brain development, billions of axons must navigate over multiple spatial scales to reach specific neuronal targets, and so build the processing circuits that generate the intelligent behavior of animals. However, the limited information capacity of the zygotic genome puts a strong constraint on how, and which, axonal routes can be encoded. We propose and validate a mechanism of development that can provide an efficient encoding of this global wiring task. The key principle, confirmed through simulation, is that basic constraints on mitoses of neural stem cells—that mitotic daughters have similar gene expression to their parent and do not stray far from one another—induce a global hierarchical map of nested regions, each marked by the expression profile of its common progenitor population. Thus, a traversal of the lineal hierarchy generates a systematic sequence of expression profiles that traces a staged route, which growth cones can follow to their remote targets. We have analyzed gene expression data of developing and adult mouse brains published by the Allen Institute for Brain Science, and found them consistent with our simulations: gene expression indeed partitions the brain into a global spatial hierarchy of nested contiguous regions that is stable at least from embryonic day 11.5 to postnatal day 56. We use this experimental data to demonstrate that our axonal guidance algorithm is able to robustly extend arbors over long distances to specific targets, and that these connections result in a qualitatively plausible connectome. We conclude that, paradoxically, cell division may be the key to uniting the neurons of the brain.

---

<sup>†</sup>Current address: Janelia Research Campus, Ashburn, VA, USA

## 19 Author Summary

20 The embryological development of each brain installs an essentially identical communication network  
21 between its cells that is roughly as complex as that between the billions of people living on Earth.  
22 Although vast scientific resources are currently applied to identifying the final pattern of connections,  
23 the *connectome*, there has until now been relatively little effort to answer the fundamental question  
24 of how this complex network across billions of neurons realized through the mitotic elaboration of the  
25 initial embryonic cell. The problem is sharpened by the constraints that construction of the network is  
26 limited by the information budget of the initial genome, and that it has no pre-existing address space for  
27 placing neurons and guiding axons. We explain how Biology can solve this problem by using the family  
28 tree of neurons to install a global space of molecular addresses, which axons can use to navigate from  
29 their source neuron to its relatives. We provide experimental evidence for this familial address space  
30 in gene expression patterns of the developing mouse brain, and demonstrate through simulation that  
31 the experimentally observed address space indeed supports global navigation to produce a qualitatively  
32 plausible default connectome.

## Introduction

A century of neuroanatomical studies attest that, while their detailed synaptic configurations may differ, the fundamental organization of neuronal types and their axonal projections are highly conserved within a species. Major resources of neuroscience are currently devoted to describing the species-specific patterns of connections, or *connectomes*, of brains [40, 52, 12, 49, 62, 35, 16, 44, 29]. These projects typically approach the connectome from a reductive point of view: Given a mature brain, extract the graph of its neural nodes and axonal edges. This paper approaches the connectome from an entirely different point of view: Given a few progenitor cells derived from the zygote, explain their elaboration into the stereotypically connected graph of the brain. We will call this approach *Constructive Connectomics*.

There are two aspects to this construction problem: The generation, from a few precursors, of the vast number and various types of neuron that comprise the brain; and the process whereby these neurons then connect to one another. The process of generation is relatively well understood [42, 36, 43]. Undifferentiated progenitors who have inherited their genome from the zygote, undergo successive rounds of mitosis resulting in an exponentially large cell mass. At each division the mother cell gives rise to two daughters whose gene expression, and consequently whose phenotype, may differ from their mother and from one another. Overall, the branched sequence of mitoses can be represented as a lineage tree with undifferentiated progenitors at its root, and fully differentiated neurons at its leaves. Although some cell types do actively migrate, the cells of the growing mass generally maintain their location relative to one another. However, differentiated neuronal cells do give rise to excrescences tipped by growth cones, and these cones migrate away from their cell while drawing out an axon in their wake, actively searching for and then connecting to remote target neurons. Typically, the growth cone(s) will branch many times during this search, so generating a highly arborized axon that maps the source neuron through brain space to its many targets.

In vertebrates the fundamental wiring of the brain is established before birth, and occurs in near informational isolation from the external world. Therefore, the information required for stereotypical axonal guidance must be contained in the brain's precursor cells, and hence is limited by the roughly 1GB information capacity of the original zygote\*. This amount is many orders of magnitude too small to explicitly encode sequences of receptor configurations for billions of neurons [64, 61, 26]. A naive encoding of this source-to-target connection matrix would require at least 10TB for a mouse brain, excluding the additional information required for detailed and staged axonal routing. The compression of the connectome into a 1GB genome implies that neuronal progenitors encode axon trajectories through

---

\*The mouse genome has roughly 2.5 billion base pairs, each encoding 2 bits. At 8 bits per byte this constitutes 625 megabytes, which generously rounds to 1GB. The number for other vertebrates is similar.

64 brain space more efficiently than the naive approach. This raises the important question addressed here,  
65 of how neuronal progenitors encode and express the complex connections of the brain, and how this  
66 process is orchestrated through development (Figure 1).

67 Growth cone guidance is crucial to the developing brain’s construction of its complex neuronal infor-  
68 mation processing circuits [6, 5, 50]. This claim is far from new: In his original description of axonal  
69 extension over a century ago, Cajal recognized that the cones are the agents of the neuronal circuit  
70 organization, and suggested that they are attracted to their targets by chemotaxis [7]. Later, Sperry  
71 elaborated that idea in his Chemoaffinity Hypothesis, whereby axons have differential markers; target  
72 cells have matching markers; markers are the result of cellular differentiation; and axons are actively  
73 directed by these markers to establish their specific connections [31, 48]. These tenets are now widely  
74 accepted, and there is by now broad experimental evidence that growth cones navigate by following gra-  
75 dients of molecular cues in their surrounding tissue [17, 5]. At decision points along their route, growth  
76 cones change their receptors to tune into a different molecular signal, and so change direction [32]. Long-  
77 range projections are achieved by growth cones passing through long sequences of growth cone receptor  
78 configurations [50].

79 Although these local molecular guidance mechanisms are relatively well understood, the global ques-  
80 tions of just how these sequences and cues are encoded and deployed in both the navigating axons and  
81 navigated tissue (i.e., Sperry’s claim that they are installed by cellular differentiation) have been largely  
82 neglected. Our work addresses these issues and offers a principled account of how the connectome can  
83 be constructed within the zygote’s information budget.

84 Our working hypothesis is that the mitotic lineage tree induces a global hierarchical map over the  
85 developing brain. This map consists of nested regions of brain, each consisting of the progeny of a small  
86 definite population of progenitors whose profile of expression over multiple genes is maintained in the  
87 average expression profile of their collected progeny.

88 We propose that by successive differentiative mitoses of development, cells implicitly obtain unique  
89 gene expression addresses that encode their respective mitotic lineages (Figure 2). Then, by inverting  
90 the developmental program of their differentiation to revisit ancestral expression states, axons could  
91 effectively traverse the global family lineage tree by re-generating specific sequences of growth cone  
92 receptor configurations—each configuration seeking a region’s ancestral expression profile—that lead to  
93 long-range targets, which are in effect their mitotic cousins. That is, the sequence of intermediate targets  
94 between two neurons is implicit in their relative expression addresses, and requires no additional genetic  
95 encoding.

96 This guidance scheme requires that the lineage tree have a dual embedding in both expression and  
97 physical space (Figure 2). Through simulation, we show that this requirement is satisfied under rather  
98 simple conditions: That the mitotic daughters have gene expression similar to their parent; and, that  
99 the daughters do not usually migrate far from one another.

100 We find clear experimental evidence for our hypothesis in the *in situ* gene expression atlas published  
101 by the Allen Institute for Brain Science (ABI) [51], which provides voxelated spatial expression data of  
102 ~2000 developmentally relevant genes throughout the brain, extending from embryonic (E) day 11.5 to  
103 postnatal (P) day 56. Our analysis of their data reveals that the expression covariance of sets of randomly  
104 selected genes pattern the developing mouse brain on multiple spatial scales. These hierarchical patterns  
105 of expression involve the entire brain and spinal cord, transcend neuroanatomical boundaries, and are  
106 consistent over the available data. Furthermore, detailed simulations of our proposed guidance process  
107 on the ABI gene expression data confirm that axons can use it to robustly navigate over long distances  
108 to specific targets, as shown schematically in Figure 2.

109 We begin by describing in detail our overall concept, which provides the rationale for our analyses  
110 of experimental data, and for our simulations, presented in Results and Discussion. We conclude that  
111 the fundamental wiring of brain can be compactly encoded and expressed through the mitotic lineage  
112 implied by the genetic code of its embryonic stem cells. Thus, the connectome and its functioning can be  
113 more readily understood in terms of the global mechanisms that generate it (constructive connectomics),  
114 rather than from interpretation of the final wiring diagram (reductive connectomics), just as inspecting  
115 source code is more revealing of principles of operation than inspecting the compiled program.

## 116 Rationale

117 The brain is an organized aggregation of billions of cells that are generated by many successive mitotic  
118 divisions of relatively few stem cells. Each of these stem cells is the root of a mitotic lineage tree that  
119 describes the branched sequence of mitoses beginning in that root and terminating in a population of  
120 post-mitotic leaf cells. Tracing these lineage trees experimentally, and understanding the relationship  
121 between the underlying cell states and their transitions during mitosis is a field of active research [23,  
122 54, 53]. However, instead of pursuing the biological detail of these lineages, we explore an overarching  
123 statistical question: Could the sequence of mitoses impose an implicit order on the expression patterns  
124 of the leaf cells? And conversely, can the statistics of gene expression across a population of leaf cells  
125 offer an estimate of their shared lineage tree? The following section and Figure 3 offers an argument  
126 that both these properties are true, and lay a foundation for interpreting the experimental results and  
127 explanatory simulations that will follow in Results.

### 128 Familial Address Space Model

129 First we consider how and why the statistics of differential gene expression between mitotic siblings should  
130 be detectable across the brain as a map-like spatial hierarchy of gene expression covariance (Figure 3).

131 Our model for the gene expression around cell division is as follows. The life of each cell  $i$  starts  
132 as it is born from its mitotic mother, ends when it divides into its two mitotic daughters, and has an  
133 expression profile  $c_i$  over all genes and averaged over its lifetime. The lineage tree is rooted in progenitor  
134 cell 1, whose expression profile is  $c_1$ . On mitosis, this parent cell splits into two daughter cells, 2 and  
135 3, whose expression profiles become  $c_2 = c_1 + \delta_2$ , and  $c_3 = c_1 + \delta_3$  respectively. Just so, the expression  
136 profile of every cell  $i$  in the lineage tree can be understood as the expression profile of its parent, plus  
137 a (positively or negatively signed) differential profile  $\delta_i$  that summarizes the complex dynamics of gene  
138 regulation. The injection of these changes through mitosis is recursive, so that the gene expression of  
139 every cell is the accumulation of all its ancestral profiles, e.g.,  $c_4 = c_2 + \delta_4 = (c_1 + \delta_2) + \delta_4$ .

140 Consider now the implications of these  $\delta$ 's for the measurement of covariance in gene expression across  
141 populations of cells. The mitosis of progenitor 1 induces an expression asymmetry  $\Delta_1 = c_2 - c_3 = \delta_2 - \delta_3$   
142 between its daughters. This asymmetry propagates down the daughter's two branches of the lineage, and  
143 is preserved across the two progenies as a quantity denoted as  $\hat{\Delta}_i$ . In other words, the parental mitosis  
144 injects a characteristic asymmetry that persists through development into the leaf cells (Figure 3a),  
145 and this signature could be detectable by an observer (Figure 3b). Every mitosis introduces such an  
146 asymmetry, so that the overall population of leaf cells, collectively, carry statistical evidence of the  
147 overall shape of the lineage. How can an observer extract this information? We argue (and demonstrate

148 by simulations below) that lineage can be recovered by hierarchical decomposition of gene expression  
149 covariance.

150 Figure 3b sketches the method. Consider first the asymmetry  $\Delta_1$  induced by  $c_1$ . This asymmetry  
151 propagates down the lineage tree resulting in a trace  $\hat{\Delta}_1$  across all the leaf cells. We may estimate  $\hat{\Delta}_1$   
152 by measuring the direction of greatest variance of gene expression, denoted  $\vec{\text{Cov}}$  over the leaf offspring  
153 of 1. And, in general we expect that  $\vec{\text{Cov}}_i$ , measured over the leaf cells of  $i$ , will be correlated with the  
154 original asymmetry  $\Delta_i$  induced by mitosis of  $c_i$ . The decomposition begins by measuring  $\vec{\text{Cov}}_1$  (across  
155 green cells). Then split these cells along  $\vec{\text{Cov}}$  into two the daughter populations (red and blue); repeat  
156  $\vec{\text{Cov}}$  for each of these; and so on recursively. This hierarchical decomposition provides an estimate of the  
157 lineage tree.

158 The precise changes in gene expression  $\delta$  are, in general, unknown. But fortunately, detailed knowledge  
159 about the  $\delta$ 's is not relevant for present purposes, only their general statistics. Figure 3c shows that  
160  $\hat{\Delta}_i$  and  $\Delta_i$  are strongly correlated when (but not necessarily only when) the  $\delta$ 's are independently and  
161 normally distributed.

162 Our Address Space Model asserts two principles. The first is that the profile of gene expression over  
163 multiple genes between a parent and daughter does not change on average. Although mitotic division  
164 may induce different gene expression profiles in the two daughters, both up- and down-regulation of  
165 any single gene are *a priori* equally likely. Thus, the expression profile over all genes averaged over  
166 both mitotic daughters will resemble the expression profile of the parent. This property (illustrated in  
167 Figure 3 a,b) is maintained recursively over successive cell divisions, such that the average expression  
168 over a given ancestor's progeny resembles its own expression. It is this property that permits hierarchical  
169 decomposition: If we are able to select the progeny of a single progenitor while excluding cells from other  
170 branches of the lineage tree, then we could measure the asymmetry  $\hat{\Delta}$  induced by the division of that  
171 progenitor by measuring  $\vec{\text{Cov}}$  over the leaf progeny (see Figure 3b).

172 The second principle is that, also on average, the daughters of a mitosis do not stray too far from  
173 one another in 3D physical space. In this case, we expect that the mitotic lineage will be systematically  
174 organized across brain space, as seen in the clustering of each daughter's progeny in Figure 3d. Therefore,  
175 mitotic asymmetries in gene expression (Figure 3a) are similarly organized in brain space (Figure 3c)  
176 and so encode a potential lineage address space. This associates a contiguous region in brain space with  
177 an ancestor in the lineage tree (larger regions correspond to earlier ancestors), and a trajectory through  
178 the lineage tree with a trajectory through brain space.

179 **Familial Guidance Model**

180 First we describe our generic model (Figure 4) for the extension of a single axon arising from a source  
181 neuron in a cellular mass. Then, in Results we will report the application of this generic model to the  
182 voxelated case of the ABI data.

183 The progeny of a given ancestor contain (on average) that ancestor’s gene expression signature. More-  
184 over, the expression profiles of cells are related (Figure 4, color gradients) by their ancestral sub-tree  
185 structure. Therefore, a particular axonal route through space from one cell to another is determined  
186 by the growth cone’s search over the successive expression signatures of the route through its ancestral  
187 lineage tree, which connects those two leaf cells (e.g., red path in Figure 4). Since the ancestral signa-  
188 tures are projected onto the leaf cells, the growth cone can navigate towards its target by maximizing  
189 the incidence of the successive signatures.

190 An axonal growth cone is instantiated by its source neuron. This growth cone extends its axon by  
191 moving in a direction that increases the match of its locally sensed expression with respect to search  
192 template. The cone selects as a search template the expression state of a node of the lineage tree. As  
193 explained above, these nodes represent ancestral expression patterns whose signatures can still be found  
194 in the current generation of leaf cells. Therefore the selection of a node as a template implies a search  
195 amongst local cells for that familial signature. The gradient of signature state in the familial address  
196 space is the frequency of encountered cells that test positively for that signature.

197 The lineage tree is implicitly encoded in every cell’s gene regulatory network, and the growth ac-  
198 cesses templates by manipulating that network. Axonal growth and arborization results from successive  
199 optimization through growth cone movement, and replacement of the search template through genetic  
200 regulation in the axon, according to the following simple rules. The growth cone takes as its initial search  
201 template the leaf state of its source neuron. At each subsequent step of the search process the growth  
202 cone senses its external environment, and moves in a direction that satisfies its internal search template  
203 better than its current position. If there are other distinct directions that also increase satisfaction, then  
204 the growth cone divides and different axonal branches pursue each of those directions.

205 All branches of the same neuron are constrained by self-avoidance. In this sense, the paths in brain-  
206 space of a growing branch are irreversible, and their paths subject to race conditions. Additionally, before  
207 each step, the cone may replace its current search template with the expression state of any adjacent node  
208 in the lineage tree, so that the search will now be for a different, but closely related, familial template.  
209 However, such steps along the lineage tree are irreversible; and so this growth cone and its downstream  
210 branches will explore only those paths in brain-space and expression space that are coded in sub-tree



211 sequences of expression templates. Growth cones terminate (or become dormant) when they can neither  
212 improve their template match, nor replace their template. The growth cone does distinguish between no  
213 gradient due to failure, and no gradient due to successfully reaching a peak. The cone will transition to  
214 the next possible state in both cases. If the cone continues to make progress with its search templates, it  
215 will ultimately reach a leaf state. If however, the local signals do not offer suitable gradients the growth  
216 cone will fail after exhausting its options.

217 In executing this search algorithm, the initial cone and its clones extend axons along all the routes  
218 in brain-space that offer contiguity in brain-space of familial expression patterns encoded in the lineage  
219 tree, and as a result create a particular repeatable axonal arborization from source to target leaf nodes.

---

## Results

We sought evidence of expression address maps by performing our hierarchical decomposition of covariances on experimentally measured gene expression data. We used the gene expression data published by the ABI in their Developing Mouse Brain Atlas [51]. Their data are provided as 3D grids of isotropic voxels. The expression energies of the  $\sim 2000$  genes were measured by *in-situ* hybridization and take any non-negative value (see Methods).

Our prediction, leaning on the principles outlined above, was that the measured covariances should reveal a dual set of systematic patterns: a hierarchical ordering in expression space, and a nesting of region in brain space. Here, ‘expression space’ denotes the abstract multidimensional space in which the gene expression profile of a cell can be represented by a point; and ‘brain space’ or ‘space’ denotes physical 3D space. We will use ‘profile’ for a fixed relative expression of all genes within a cell or voxel, ‘pattern’ to denote an evident spatial regularity in gene expression, and ‘organization’ to denote the systematic order underlying these patterns.

### Global spatial expression hierarchy

We performed our hierarchical decomposition (described in the Concept and Methods sections) on the experimentally measured spatial gene expression, and consider to what extent that hierarchy could constitute an estimate of the mitotic lineage tree. Figure 5 shows the results for P28. Other time points from E11.5–P56 are shown in Figures S13–S20.

The hierarchical decomposition is based exclusively on the gene expression covariance measured across unordered sets of voxels: The physical locations of voxels within the brain were not taken into account. However, when the voxels are now considered in their correct physical locations, we observe that the sets selected during the unordered hierarchical decomposition form nested and spatially continuous regions spanning brain space. Thus, the hierarchy of nested voxel sets found by our analysis in expression space parallels a hierarchy of spatially continuous regions in brain space, which is not entailed by the analysis.

To confirm that these patterns are due to intrinsic spatial organization of gene expression rather than being induced by the analysis, we performed the same decomposition on voxels with randomly shuffled gene expression values (see Methods). After shuffling, all spatial structure vanishes (Figures S13–S20).

We quantified the degree to which the hierarchy of asymmetries derived from gene expression projects into physical brain space by measuring the spatial spread of the voxel set. If the nested voxel sets form continuous regions in space beyond the first few generations, then the spread of their constituents should decrease over successive generations as the sub-populations become more resolved (and therefore

251 smaller). Otherwise, if the constituent voxels are scattered across space, their spread would remain  
252 roughly constant. We find that indeed the spread consistently reduces with generation (Figure 5c).

253 In addition to spanning brain space, the patterns are consistent over time from E11.5 to P56. The  
254 temporal consistency cannot be measured directly, because there is no clear map between individual  
255 voxels of subsequent time points. To side-step this problem we instead project the voxels of one time  
256 point onto the hierarchy measured at another time point. In Figure 6 the voxels of all available time  
257 points are projected onto the hierarchy measured at P28.

258 To quantify the temporal consistency of the spatial patterns we measure how many voxels are sorted  
259 into the same hierarchical bin when projected into the hierarchy measured at the original time point  
260 versus the hierarchy measured at P28. We find that the spatial patterns at the various time points agree  
261 significantly above chance (Figure 6b).

262 We also measure the correlation between the axes of covariance  $\text{Cov}^{\vec{v}}$  among the same hierarchical  
263 node at different time points, and among different hierarchical nodes at the same time point. We find  
264 that the axes of the same node across time correlate more than the axes of various nodes within a single  
265 time point (Figure S12).

#### 266 **Hierarchy exists in small gene sets**

267 As we have selected genes without bias, the spatio-temporal patterning may be a general property of  
268 gene expression, rather than the specific property of a particular set of specialized genes. We explored  
269 this possibility by randomly selecting sets of genes of various sizes, and then measuring how well the  
270 spatial patterns were maintained.

271 From the spatial gene expression data we found that small sets ( $\sim 50$ ) of genes selected randomly from  
272 the database can already achieve an accuracy (ratio of voxels sorted in the same hierarchical bin) with  
273 the signal over all genes (Figure 7). So, the lineage identity of a cell may be encoded in the profile of  
274 any small set of genes.

#### 275 **Simulated mitosis induces spatial hierarchy**

276 We verified that our division model is able to explain the above results by simulating the mitotic devel-  
277 opment of a cell mass from a small pool of precursors (see Methods for a more detailed description of  
278 the simulation).

279 The simulation embodies the constraints of the model. The basic element of the simulation is a space-  
280 occupying (not a point) cell that expresses a profile of genes. When a cell divides, the expression profiles

281 of its two daughters are normally distributed variants of the expression of their mother. The cells are  
282 additionally positioned in a spatial 3D grid. When a cell divides it pushes a nearby cells in a random  
283 direction to make space to place the mitotic daughters adjacent to one another (see Methods). In this  
284 way, we are able to efficiently simulate the growth of a volume of cells, analogous to the embryonic brain.  
285 A particular lineage tree of cells is generated by recursive application of this division rule.

286 The simulation results in a mass of 500,000 cells, each expressing 500 genes, and distributed over  
287 100 independent lineages. This mass was divided into 21140 voxels of 3x3x3 cells (excepting voxels  
288 on the outer surface, which may contain fewer cells), to emulate the voxelation of the ABI data. We  
289 then applied the same hierarchical decomposition as was applied to the experimental data, yielding  
290 qualitatively similar results (Figure 8). This simulation indicates that the spatial and genetic constraints  
291 of the model are sufficient to explain the spatial patterns that we observed in the developing mouse  
292 brain.

#### 293 **Simulated axons traverse the brain**

294 We simulate the process of axonal growth to demonstrate that they can use the Familial Guidance Model  
295 described in the Concept to navigate through the voxels of the ABI gene expression atlas (Figure 9). The  
296 Guidance Model in the Rationale was described in terms of individual cells and a given lineage tree. In  
297 applying that model to the experimentally observed ABI data, we have to consider that the expression  
298 data is voxelated, with each voxel containing many cells; the lineage tree is only estimated, as described  
299 in the previous section; and we cannot yet predict which exact set of genes participates in the address  
300 space. So, we need to test whether robust long range guidance is possible at all using our proposed  
301 mechanism, rather than predict specific projections.

302 The growing axons were simulated using a spatial-state graph approach. In this approach, the axon  
303 traverses a graph where each nodes represents the growth cone at a spatial location (i.e. a voxel) with a  
304 specific receptor configuration. Two nodes are connected by an edge if they are spatially adjacent and  
305 represent the same receptor configuration—this represents a move of the growth cone in space; or if they  
306 represent the same spatial location, and the receptor configurations are adjacent in the lineage tree—this  
307 represents a transition of the growth cone in state.

308 The axon can only traverse an edge to an adjacent node if the gene expression in that node is a better  
309 fit to its receptors than the current node (i.e. if the currently held ancestral state is more correlated to  
310 the adjacent node). This ‘biological’ algorithm resembles Dijkstra’s algorithm for finding the shortest  
311 route between two nodes of a graph [10].

312 Simulated axons were found to be able to extend up to about 10  $\mu\text{m}$  source-tip distance, with axonal

313 lengths of up to 16  $\mu\text{m}$  (Figure 9b). The axon length is longer than the source-tip covered distance  
314 because the axons do not move in a straight line. Nevertheless, the relation between path and straight  
315 distance is close to linear for many axons, particularly those of shorter ranges.

316 The axonal guidance is robust against signal noise. We demonstrated this by adding noise to the  
317 gene expression after the lineage tree was reconstructed, but before the axons began guidance, effectively  
318 reducing the signal to noise ratio. The added noise does not significantly change the trajectories of  
319 the axons (Figure 9e). However, when gene expression is shuffled completely, either before or after  
320 reconstructing the lineage tree, axons fail to navigate beyond 1 or 2 voxels (not shown).

321 Similar axon length distributions are found from the fully simulated tissue (Figure 9d). This result  
322 further supports the hypothesis that simple constraints on mitosis can induce the address space.

323 The control case for axonal arborization is a random walk axon of identical total length, whose growth  
324 cones are still self-avoiding, but able to move in random directions at every step. We find that the random  
325 walk axons have much lower specificity, robustness, and spatial reach, than the navigating axons (See  
326 Figure 9e). Note that for the navigation algorithm the total length of the axon is an implicit result, rather  
327 than a set parameter. Thus, the random walk axon already over-informed compared to the navigating  
328 axons.

329 We generated a typical connectivity matrix by simulating 500 axons rooted in voxels sampled uni-  
330 formly from the available data, (Figure 9f). The matrix is sparse and block structured, with many  
331 off-diagonal components (rather than narrow diagonal band), indicating a specific, regionalized, con-  
332 nection pattern. Remarkably, these typical connections conform to reasonable anatomical patterns, as  
333 can be appreciated by comparing the block-structured axonal connections with anatomical regions taken  
334 from the independent annotations of the Allen Brain Institute (Figure 9f). We emphasize that these  
335 anatomical annotations are not used at any point during simulation or analysis.

## 336 Discussion

337 The literature describing the progressive organization of vertebrate brains over embryonic and evolution-  
338 ary time [42, 2] has emphasized local organizational processes and their dependence on a local landscape  
339 of molecular signals [37, 1]. However, that focus neglects the more global question of how the guidance  
340 landscapes are themselves established. Long-range migration of neurons, extension of their axons, and  
341 the formation of their many synaptic connections require a global orchestration of guidance cues [17, 50]  
342 at various spatial scales.

343 In this paper we have explored the hypothesis that the mitotic lineage tree, which is implied by the  
344 cellular gene regulatory network (GRN), is key to understanding the necessary global orchestration of  
345 molecular cues. The lineage tree induces a global guidance address space over the embryonic brain that  
346 is encoded in profiles of expression of multiple genes. Some part of the expression pattern of each cell  
347 includes the precursor signatures that encode its ancestral path down the lineage tree. The expression  
348 signatures of early ancestors are broadly spread across the present progeny, whereas the distribution of  
349 signatures of recent progenitors is more restricted. These systematic differences in location and scale of  
350 distribution of ancestral expression patterns supports the address space. Because the address reflects  
351 family lineage, we call it a Familial Address Space (Figure 3).

352 We further propose that the address space is navigable by axonal growth cones, which are able to grow  
353 to specific target addresses by matching local gene expression patterns to those of successive nodes of a  
354 lineage tree traversal. We call this process Familial Guidance (Figure 4). In other words, the expression  
355 of the brain, and the growth cone's ability to exploit it, are dual consequences of the brains developmen-  
356 tal process which both creates the Familial Address Space as a consequence of cellular differentiation,  
357 and then exploits that differentiation for active cellular organization including the formation of axonal  
358 connections.

359 Molecular labels were proposed by Sperry to explain how retinal axons select their targets in the  
360 tectum [31, 48]. However, it has been unclear in how unique, dynamic, and matching labels could be  
361 simultaneously presented by the tectum and recognized by axons from the retina [56]. Particularly, in  
362 these and other explanations of circuit formation [11, 46] it is unclear how the reproducible connectivity  
363 can be encoded within the genetic budget. Our proposed mechanism resolves this issue by showing  
364 that the lineage tree can efficiently install unique labels in target tissue, and that navigating axons can  
365 recognize them due to their shared origin in the cellular GRN. It also extends the scope of comprehensive  
366 molecular labels from the retino-tectal projection to the brain at large.

367 We searched for evidence of such an address space in the ABI mouse brain atlases, because they

368 provide voxelated (rather than tied to pre-conceived anatomical regions) spatial expression data of de-  
369 velopmentally relevant genes throughout brain development. Previous analyses of these and related  
370 atlases have been largely concerned with identifying profiles of co-expression that support anatomical  
371 organization [37, 39, 38, 34, 51]; and also whether these regional profiles can be explained in terms of the  
372 known expression of specific cell types [18, 58, 60]. Although there are also systematic transcriptional  
373 similarities across cortical areas [34, 19], no global map-like organization has been reported as yet.

374 Our results now indicate that systematic spatial patterns of gene expression covariance do exist and are  
375 widespread in the embryonic and postnatal brain. These patterns involve non-specific groups of genes,  
376 occur on multiple spatial scales across the entire brain and spinal cord, transcend neuroanatomical  
377 boundaries, and are consistent at least from E11.5 to P56. Interestingly, we found that the primary  
378 axis of variance corresponds spatially to the dorso-ventral axis of the embryonic brain, rather than the  
379 antero-posterior axis that is expected on the naive assumption of greater variance along a longer axis.  
380 This suggests that the patterns do not simply reflect the geometry of the developing embryo, but are  
381 related to controlled regionalization in embryogenesis itself.

382 We explored the embryological origin of these patterns by analyzing the statistical structure of the  
383 expression covariance [20], rather than the relationship between expression and anatomy [34] or to pheno-  
384 typic expression of cells [18]. The essence of this structure is that the differential gene expression between  
385 arbitrary sibling branches of a lineage tree (the asymmetry) in expression space has a dual expression  
386 as covariance across the region of brain space occupied by the leaf nodes of those sibling branches, as  
387 proposed in the Rationale section. Indeed, simulations of the Familial Address Space model showed good  
388 qualitative agreement with the experimental data (Figure 8). They confirm that the differential gene  
389 expression profiles induced by early divisions can be reconstructed from the gene expressions observed  
390 in the leaf cells of the lineage tree.

391 The covariance patterns indicate only that common gradients of expression exist across sets of genes,  
392 and seem to be hierarchically organized. Our results do not of themselves indicate which genes contribute  
393 most strongly to the patterns, nor which, if any, are actually utilized for addressing. It remains to be  
394 tested whether the spatial organization observed in the current data is restricted only to the  $\sim 2000$  genes  
395 that the ABI chose for assaying [51], and consequently to the subset of  $\sim 1,240$  that we have analyzed.  
396 However, both the experimental data and our simulations indicate that the organization does not arise  
397 from the expressions of a specific set of genes dedicated to encode spatial structure, but rather can be  
398 found in the expressions of any sufficiently large ( $> \sim 50$ ) set of genes. Thus, the spatial hierarchy in  
399 gene expression depends primarily on the statistics of the induced changes, while the specifics of gene  
400 function are less relevant to their generation.

401 The range of spatial scales (Figure 5), temporal stability (Figure S11), and near orthogonality (Fig-  
402 ure S12) of the covariance nesting is suggestive of an address space. This putative address space has an  
403 interesting property: Because the nested regions are a projection of the lineage tree onto 3D brain space,  
404 regions composed of cells that are closely related in their respective lineage trees are also close in space.  
405 Thus, the address map is a systematic arrangement of cells in terms of their ancestral gene-expression,  
406 and so provides an implicit encoding of cell lineages that could be used as a relative localization mecha-  
407 nism that can guide tissue organization. For example, migrating cells or individual axonal growth cones  
408 could steer to their target locations by tracing a sequence of address patterns. These patterns need not  
409 have evolved with the intention to guide growth cones: It is sufficient that a growth cone recognize the  
410 pattern and exploit it as a directional cue. Growth cones might recognize these patterns, because they  
411 are not only the product of the global developmental program, but themselves contain that full program  
412 in the genetic code of their source cell. Thus, we may expect migrating cells and cellular excrescences  
413 such as axons to have methods of decoding that and relate to mechanisms by which the expression  
414 patterns are themselves induced.

415 While constructing the address space, the mitotic tree is rooted in the stem state of its gene regulatory  
416 machinery. However, if the leaf cells root their regulation in their own current states, then their potential  
417 exploration paths are traversals of regulatory paths to destination states, as seen from their origin state.  
418 Thus, the exploration paths of the growth cone can be seen as the lineage tree hung from a leaf (with some  
419 pruning). So, growth cone routes are anti-differentiating up the tree to some ancestral node, followed by  
420 re-differentiating toward the leaf states accessible from that ancestral node.

421 An appealing aspect of this lineage-induced address is that it greatly simplifies the evolution of complex  
422 spatial organization of cells. The systematic spatial labeling of cells is given as a direct consequence of  
423 mitotic specialization and cell proximity. Evolution needed only to discover how to exploit this labeling  
424 for organizational migration of cells and their components (e.g. growth cones). It could opportunistically  
425 select a set of gene products for axonal growth cone guidance, because most gene sets will encode a  
426 similar spatial pattern. This generality of the address space could also help to explain the wide range of  
427 guidance cues that have been documented [50, 28, 45]. The selection of a subset of cell surface markers,  
428 or diffusible markers would be a convenient choice for growth-cone sensors.

429 The Familial Address Space model is entangled by two factors. Firstly, the mitotic root of the  
430 developing brain is difficult to define exactly. It seems reasonable to consider as starting point a small  
431 collection of early progenitor cells downstream from the zygote that are committed to formation of  
432 the neural tube, rather than the single progenitor that we have assumed for simplicity in describing  
433 the model. Secondly, the experimental data are voxelated and so average over the various cell types



434 (possibly derived from different lineage trees) that they contain. These two factors will mix and average  
435 the effects of the simple model. Nevertheless, if the lineage of mitoses is sufficiently coherent in time  
436 and brain space, then the statistical signature of the mitotic process remains detectable. The spatial  
437 patterns persist even when confounding mechanisms, such as symmetric cell division, de-synchronized  
438 mitotic clocks, data voxelation, and multiple independent lineage trees are introduced to the simulation  
439 (Figure 8).

440 Gene expression is a central aspect of our Familial Address Space model. The gene expression of  
441 a cell is a 2000-element vector, which encodes the expression energies of the  $\sim 2000$  genes used by the  
442 ABI atlas. Since the exact expression profile of the root cell is unknown, we assign to it a fixed pseudo-  
443 random number. The profiles of its progeny are obtained by successive applications of  $\delta$ s, drawn also  
444 from a frozen generator. These frozen stochastic expression profiles and their transformations are merely  
445 a convenient proxy for the unknown (deterministic) sequences of gene expression over consecutive cell  
446 division that occur in individual cells during development. The actual sequences of expression are not  
447 crucial to the model because it is the induction by mitosis and then the propagation of the statistical  
448 signal that is of interest here, rather than the absolute expressions of particular genes. We may also allow  
449 that the stochastic profiles be subject to cell-external or internal factors, provided that these influences  
450 are reproducibly regulated as part of the developmental process (and thus not due to environmental  
451 noise external to the embryo).

#### 452 **Axonal connections by Familial Guidance**

453 There has been substantial progress in understanding how axonal growth cones respond to local guidance  
454 cues [5]. They are exquisitely sensitive to local gradients, able to detect gradients on the order of a  
455 few molecules across their span [41]. However, physical noise, ligand binding, and other signal detection  
456 considerations indicate that molecular gradients alone are insufficiently robust to explain axonal guidance,  
457 particularly at longer spatial scales [17, 5]. Over these longer distances the algorithmic rather than the  
458 reactive aspects of guidance rather relevant.

459 Previous models have described network formation in terms of cellular agents containing a small, but  
460 explicit, program consisting of few developmental primitives [63, 64, 65, 4, 3]. These generative cellular  
461 programs include physical constraints on development to explain network formation [21]. Our work puts  
462 such generative algorithms in a broader context, by showing how physical constraints induce an address  
463 map essentially without any explicit program. The generation of the address map acts as an organizing  
464 principle that more specialized cellular programs might exploit. Here, we have shown that even a very  
465 generic axonal algorithm, Familial Guidance, is able to install a basic connectome.

466 The Familial Guidance Model is cast as a growth cone guidance algorithm. The algorithm depends  
467 on the embedding of the lineage tree in both expression space and brain space (Figure 4). The axon  
468 navigates by entering a control loop that first uses the inverted developmental program to revisit an  
469 ancestral expression state, and then configures the receptors in the growth cone to search for marks of  
470 that expression in the surrounding tissue. When the local optimum is reached, the axon transitions to  
471 another ancestral state and the process repeats, until another leaf is found. The growth cone's choice  
472 (i.e. reconfiguration) points reflect transitions through the ancestral lineage tree: The growth cone knows  
473 how to reconfigure its receptors appropriately because it is able to traverse (in expression space) the lineage  
474 tree.

475 To find its target an axon must trace a route through physical brain space. Growth cones at the  
476 tips of axonal branches guide the extension of axons by receptors in their membranes. These receptors  
477 recognize morphogenic cues [50], and also membrane bound markers [28], and either promote or prevent  
478 the extension of the axon in the direction of increasing cue concentration or prevalence. The cones  
479 dynamically change the profile of receptors in their membrane so as to change the criteria for direction  
480 sensing at discrete way-points [45]. In our model, these growth cone receptor profiles correspond to  
481 expression signatures ('marks') of ancestral cells. That is, the receptors recognize these 'marks' in  
482 current cells that they have acquired by virtue of being the progeny of those ancestors. A guidepost cell  
483 would then be an early born cell, in which these marks are still strongly expressed. Figure 3 explains how  
484 expression covariance patterns are induced at cellular level as  $\delta$  changes in  $c_i$ , but that the global address  
485 space that arises is observed over whole populations of cells as  $\hat{\Delta}$ . And in this paper we have emphasized the  
486 experimental observations of lineage address space composed of the ordered  $\hat{\Delta}$ . But, of course, to make  
487 use of this lineage address space for guidance, individual growth cones will have access only to the local  $c_i$ ,  
488 and their resultant guidance cues secreted into the extracellular space or exposed on cellular surfaces.

489 The model asserts that the navigation sequence can be generated if the axon inverts its developmental  
490 program to anti-differentiate to precursor expression states, and thereby traces a route through the  
491 lineage tree. There is evidence that cells and also neurons are able to de-differentiate as a whole [14, 30,  
492 57]. However, we require only that de-differentiation occur on some subset of the genome relevant to the  
493 familial marks. While there is as yet no systematic work on this question, there is nevertheless clear and  
494 growing evidence that growth-cones used elaborate local context-dependent mRNA processing during  
495 their guidance behavior [55, 25, 9].

496 Our guidance algorithm requires that axons perform a virtual traversal through the neuronal lineage  
497 tree to generate a physical route map. This conformity is possible only if (1) the tissue retains a persistent  
498 record of the lineage tree, so that expression signatures of ancestral cells can be recognized in their progeny

499 after the ancestors have vanished (through mitosis), and (2) routes through the lineage tree are indeed  
500 matched (at least in relevant cases) by continuous routes of adjacent progenies through the tissue. We  
501 found evidence for these two conditions in voxelated gene expression data. The forward projection of  
502 a hierarchy measured at an early embryonic age matches that measured at later age (Figure 6, S11)  
503 indicating that the gene expression of cells holds a persistent record of their ancestral gene expression  
504 profiles. And secondly, the voxels of the grand lineage tree estimated without regard for location, are  
505 nevertheless grouped together in space at each tier of the hierarchy so forming adjacent and contiguous  
506 regions (Figure 5, S13–S20), indicating that lineage paths may indeed form continuous trajectories in  
507 the tissue.

508 We tested the Familial Guidance algorithm in the original voxelated data. Because we do not have  
509 access to the true mouse lineage tree and its genetic states, we used the reconstructed lineage tree  
510 obtained by hierarchical decomposition of the voxelated data as an estimate the growth cone reconfig-  
511 uration transitions. The growing axons were simulated using a spatial-state graph approach. These  
512 simulations confirmed that axons do indeed grow to more specific and longer range targets than the  
513 random walk model, and that an arbitrary collection of axons reproduce qualitatively the sparse and  
514 block structured connection matrix of the kind observed in experimentally observed connectomes. These  
515 typical connections conform to reasonable anatomical patterns, as can be appreciated by comparing the  
516 block-structured axonal connections with anatomical regions taken from the independent annotations  
517 of the Allen Brain Institute (Figure 9f. Although this general agreement is in itself remarkable, the  
518 particular connectome is not yet a proper prediction of actual connectivity. Several issues will need to  
519 be resolved in order to improve the prediction. Obviously, the range and resolution of experimental data  
520 must be improved: the ABI data offers only subset of genes, and even these data degraded by averaging  
521 over voxels and brains. Furthermore, the address space was inferred from the set of all genes. However,  
522 this set is only one of many possible sets of genes that support the true address space (Figure 7). It is  
523 likely that evolution has selected a particular set of genes to establish a particular address space that  
524 supports well evolution’s preferred connectivity. Unfortunately, this particular set of genes is as yet un-  
525 known to us, although there are some strong candidates for inclusion [24]. Furthermore, the simulations  
526 themselves are restricted. Guidance was only simulated at one time point, consequently the trajectories  
527 are generated as if development were frozen in the P28 geometry and gene expression. Of course, other  
528 trajectories will be possible at different developmental times. And for reasons of computational resource,  
529 sampled axon sources were a randomly sampled subset of all voxels, so many trajectories are omitted:  
530 It would take prohibitively long to simulate all sources.

531 Overall though, the address space induced by mitosis, as well as the guidance process that it supports,  
532 is consistent with reasonable axonal projection pattern. Full agreement between our simulations and

533 experimentally observed projections will depend on the agreement between our estimated differential  
534 gene expression model, and the true differential gene expression generated by the actual gene regulation  
535 network of the mouse. These simulations also confirm at least a partial projection of the expression  
536 space onto brain space. This conformity is not self-evident, because the high dimensional expression  
537 space cannot be faithfully projected into the lower, three dimensional brain-space. Even in the best  
538 embedding, the pairwise distances between the embedded nodes in 3D Euclidean space cannot exactly  
539 match the pairwise path distances between nodes in the tree. The error can be made arbitrarily small in  
540 the limit of many dimensions. This limit is not relevant for 3D physical space because its dimensionality  
541 is fixed; but for gene expression space it is relevant because the dimension can be increased by recruiting  
542 genes for the embedding. Fortunately, constraints on mitotic daughter migration will result in at least  
543 some regions of continuity in the lineage tree embedding. Thus, although not all traversals through the  
544 lineage tree will be matched by traceable paths in brain space, those traversals whose embedding in  
545 brains space provides for continuity of expression signals will be successful. This property is reflected  
546 in that our connectivity matrix is not fully connected or diagonally structured, but sparse and block-  
547 structured (Figure 9f). The manifold of traceable paths, and so connection probabilities, will no doubt  
548 be influenced by the anatomical distortions imposed on the growing cell mass by factors such as relative  
549 mitotic rates, cell size, asynchronous axonal outgrowth, ventricular volumes etc.

550 Note that our algorithmic approach differs from more usual methods for the generation connections,  
551 such as a connection table of source destination pairs, or a graph generation rule (e.g. Erdős–Rényi)  
552 that connects nodes according to a statistical model. For example, a common connectome generating  
553 rule is that Euclidean distance between pairs of neurons be inversely proportional to their connection  
554 probability. In this case, two nearby neurons are more likely to connect than distant neurons [13]. A  
555 typical implementation of this rule would involve measuring the Euclidean distance between two neurons,  
556 and then deciding whether a connection exists between them by evaluating a probability distribution.  
557 This method will establish suitable entries in a table, but does not explain how these connections should  
558 be grown in space. To satisfy the rule by a developmental algorithm the growth cones must perform a  
559 random walk in space, governed by a fixed probability of extension; and connect to encountered neurons  
560 also with some fixed probability. This simple connection algorithm closely reproduces the empirically  
561 observed axonal length distributions. However, because the behavior of these parameterized stochastic  
562 models depend on random data (rather than fixed data), they are also unable to explain the repeatability  
563 (across individuals) patterns of axonal trajectories and connectivity observed in biology. Repeatability  
564 would require that the ‘random’ walk be decided by a frozen random number generator, so simulating a  
565 deterministic guidance mechanism, whose data is that frozen random number.

566 A traversal of axons through the lineage tree explains the experimental finding that cortical excitatory

567 cells seem to preferentially target their clonal siblings [8, 27, 59], rather than simply nearby targets.

568 Our axonal growth simulations are only for pioneer axons. Many other axons may reach their remote  
569 target through fasciculation with a pioneer axon than by pure pioneering themselves [47]. However,  
570 these follower axons could still use the same guidance mechanism as pioneers to make decisions for  
571 (de-)fasciculation, so avoiding additional encoding as to when to fasciculate with which other axon. (If  
572 such a fasciculation specific route encoding were necessary, it would probably require on the same order  
573 of information as the naive wiring diagram, depending on how prominent fasciculation is.) An elegant  
574 solution would be that each axonal segment maintains the expression state of the growth cone when it  
575 created that segment. In this case the growth cone is seen as any other axonal segment, except that  
576 the growth cone is motile. In this way the axon segments become strong markers, expressing the signal  
577 that other growth cones can follow. Their signals would be exceptionally strong because the growth cone  
578 imparts to each segment the ground-truth ancestral signature obtained from source genetic information,  
579 rather than the a noisy signature that has been projected through generations of progeny. This address  
580 efficiency could explain the observation that the growth cone of a fasciculated axon is only a fraction of  
581 the size of a pioneering axon's growth cone. Such an Ariadne mechanism would permit late growing axons  
582 to traverse areas whose geometric continuity with the lineage tree existed earlier during development,  
583 but has since been disrupted.

#### 584 Genetic encoding of Familial Guidance

585 The genetic (and epigenetic) information required for instantiating the physical neuronal network is largely  
586 limited by the roughly 1GB information capacity of the original zygote. Evidently, the detailed physical  
587 network arise through a decompression of this information, resulting in the connections summarized  
588 by the connection matrix. A naive encoding of this matrix for mouse brain connectome would require  
589 roughly 10TB. However, viewing the connectome as a generic connection matrix considers too many  
590 possible configurations, and consequently overestimates the information necessary to specify the brain's  
591 connectome among them. No doubt there are regularities in axonal construction that can express var-  
592 ious arborization types using simple codes [64, 22], and there are means to generate connectomes from  
593 compressed codes that do not suffer from the constraints of the construction process [26]. However, the  
594 many disparate long range pathways of the brain would require more elaborate codes and co-ordinate  
595 systems. The Familial Guidance principle shows how the implicit, compressed, representation of the  
596 target connectome can be decompressed through the very construction of the neurons to be connected.  
597 Self-replication, with its inherent constraints, organizes the growing mass of cells in a family hierarchy  
598 whose parent-child relations manifest as spatial gradients of differential expression. These gradients act  
599 as a network of roads that axons explore to reach their targets. The directions for axons to establish a

600 default wiring in this familial landscape are simple: grow and branch along every accessible road. The  
601 final network and the landscape are hand in glove. In this view, growing the landscape is at least as  
602 relevant as axonal outgrowth. But fortunately the growth of the fundamental landscape follows very di-  
603 rectly from simple constraints: mitosis, and so has low informational cost. In this view, the 1GB genome  
604 contains no compressed 10TB connectomic blueprint for the brain. Rather, the genome encodes the  
605 host cell, which is essentially a self-replicating physical machine [33] whose execution (or decompression)  
606 generates the wired brain. Therefore, the size of the brain's blueprint is not limited by the size of the  
607 genome, just as the uncompressed size of the output of a computer program is not limited by the size of  
608 its source code.

## 609 Conclusion

610 Our analysis of gene expression in embryonic and postnatal mouse brains reveals a hierarchy of spatial  
611 patterns of expression covariance that extend over the entire brain, and are stable over the available  
612 data. This organization is present across the 1240 genes analyzed. However, they are also present in the  
613 expressions of random subsets of as few as 50 genes. The organization is consistent with a multi-scale  
614 address space that could be exploited for cell migration or growth cone guidance. Our simulation studies  
615 confirm that this organization can be generated by persistent asymmetries of gene expression introduced  
616 by the successive mitoses of the lineage trees that give rise to the brain, provided that mitotic daughters  
617 do not stray too far from one another after their birth.

618 Due to the generality of these mitotic constraints, it is likely that similar map-like structures exist  
619 also in other tissues, and may provide a fundamental scaffold for cell migration and tissue organiza-  
620 tion. However, the Familial Address Map has particular relevance for neurons, whose many stereotyped  
621 connections cover distances up to the scale of the whole brain.

622 We conclude that the fundamental wiring of brain can be compactly encoded and expressed through  
623 the mitotic lineage implied by the genetic code of its embryonic stem cells, because the arborizations of  
624 axons are just the available search paths through lineage tree. So, paradoxically, (cell) division may be  
625 the key to uniting the neurons of the brain. The resolution of the paradox is that division in reverse is  
626 unification.

627 Future work must establish: which specific sub-set of genes is used for axon navigation; how the  
628 growth cone reverts its host's differentiation and how receptors are generated to recognize an ancestral  
629 state; and how the address space, that is the geometry of the brain and spatial gene expression, are  
630 tuned to realize a specific observed connectivity.

631 Contrary to the prevailing reductive approaches to understanding the wiring of the brain, this paper  
632 has taken a more global synthetic view. While much more effort will be required to confirm the var-  
633 ious implications of our approach, the theory and available data are remarkably consistent; and offer  
634 the prospect that the connectome and its functioning can be more readily understood in terms of the  
635 global mechanisms that generate it, rather than from interpretation of the final wiring diagram, just as  
636 inspecting source code is more revealing of principles of operation than inspecting the compiled program.

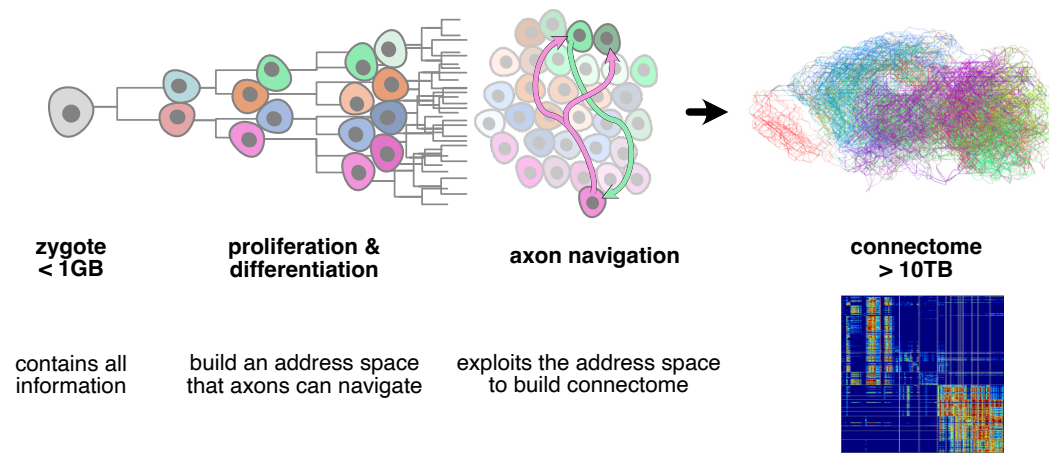

Figure 1: The connectome is the result of a constructive process that starts ultimately with the zygote, and involves the two aspects of first generating a mass of cells with various types, and then routing axons through this mass to their proper targets. An observer's description of the resulting detailed mouse connection matrix (right bottom) takes at least 10TB to encode. However, as development occurs largely in isolation, all instructions to construct this connectome must fit into the 1GB of genetic material of the zygote. This implies that neural progenitors have efficient methods for expanding the highly compressed wiring instructions into axonal trajectories. To do this, they need to, as they proliferate and differentiate, install a space of molecular addresses that axons can exploit for navigation.



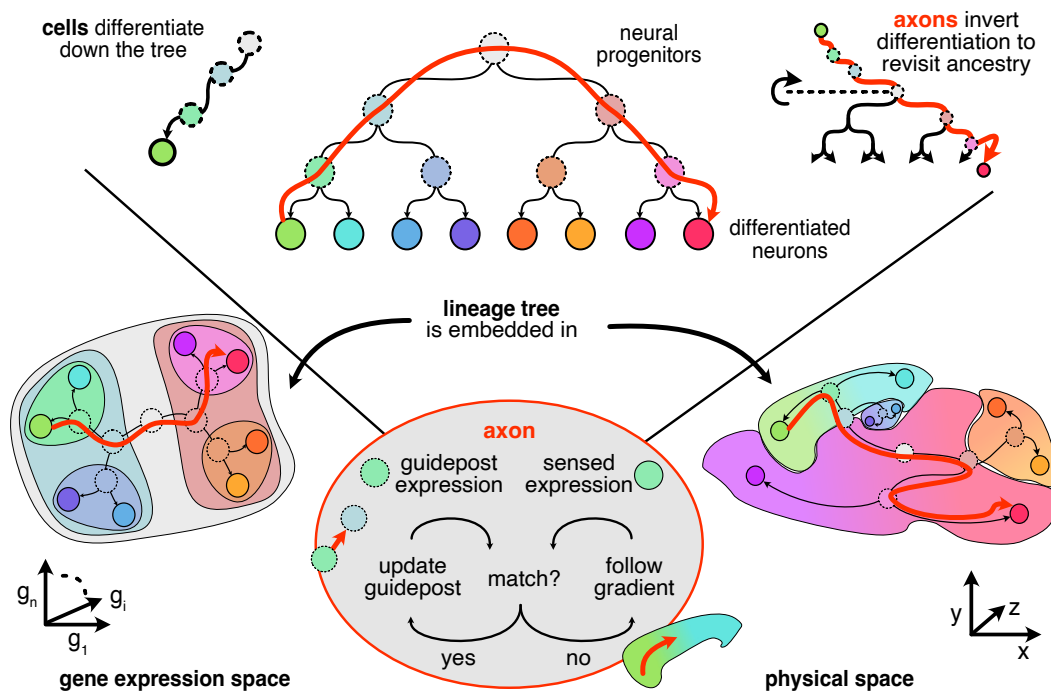

Figure 2: As progenitors divide they progressively differentiate their gene expression until they reach their post-mitotic neuronal states at the leaves of the lineage tree (**a**: top left). Constraints on mitosis (see text) embed the global neuronal lineage tree (**a**) into both gene expression (**b**) and physical space (**c**), so that cells of related differentiation have similar expression profiles (similar colors) and are nearby one another physically. Consequently, a trajectory from one leaf node to another through the lineage tree (**a**: red arrow) often corresponds to an unbroken trajectory through both gene expression space (**b**: red arrow) and physical brain space (**c**: red arrow). An axon navigates by inverting its source neuron's instance of the global genetic differentiation program (**a**: top right). This inversion generates a sequence of expression profiles that correspond to ancestral states and so act as guidepost profiles. **d** The axonal branch configures its growth cone to match the sensed expression to the internally generated expression, and so moves to the direction that improves that match. When the match can no longer be improved by moving, the axon updates its internal state to the next ancestor, and repeats. If the match between internal and external expression can be improved by moving into multiple different directions, or by transitioning to multiple different states, the single axonal branch is split into two new branches that continue to execute the same algorithm, but whose independent states may subsequently diverge. When an axonal branch arrives at a leaf state, both in expression and physical space, navigation of that branch is complete and local synapses are formed.

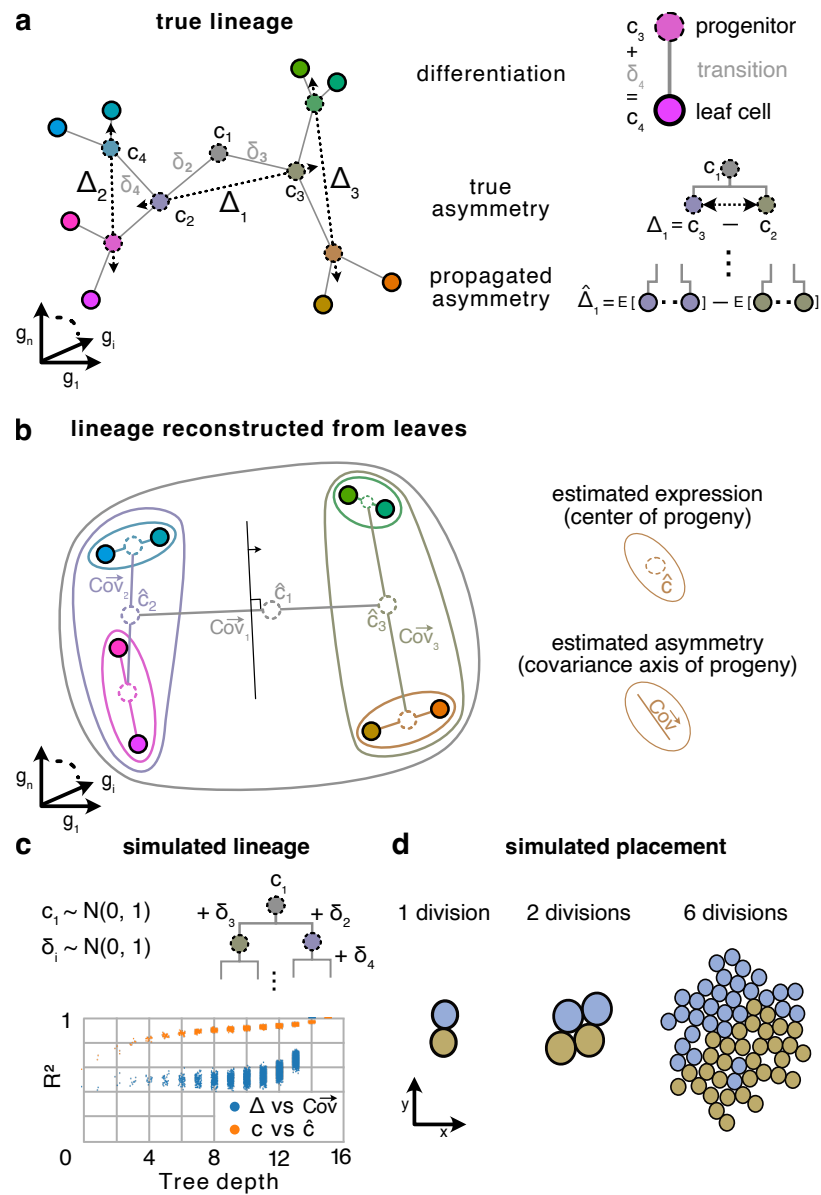

Figure 3: **a** Cells are points positioned in high-dimensional expression space, where each axis represents the expression of one gene. Here, this high-dimensional space is reduced to 2D dimensions for plotting purposes, so that their 2D distance approximates their high-dimensional distance. In our division model, the differential expression between a parent cell  $c_1$  and its daughters  $c_2, c_3$  is a normally distributed random vector representing the genetic state transition from parent to daughter, denoted  $\delta_2 = c_2 - c_1$ . (Here we use the division of the root progenitor 1 as a running example for any division.) The differential expression between two siblings, which we call the parent's asymmetry, is denoted  $\Delta_1 = c_3 - c_2 = \delta_3 - \delta_2$ . As a result, the correlation in gene expression between two cells reflects their distance through the lineage tree. (See **c** for verification of this process by numerical simulation.) **b** The expression of a progenitor can be estimated as the mean expression over its leaf progeny; and the asymmetry of a progenitor can be measured as the main axis of variance across its progeny. The diagram shows only the leaves of the lineage tree show in **a**—they have identical positions in embedded expression space. Each nested contour encloses the progeny of a progenitor; lines within the contour indicate the main axis of variance across the enclosed progeny; and dotted circles the average expression across the progeny. The sets of progenies for individual progenitors can be obtained by iteratively splitting the progeny along their main axis of variance, so with a decision boundary (black line with arrow) orthogonal to this axis. **c** Numeric simulation of expression profiles induced by our division model, and subsequent reconstruction of expression profiles and mitotic asymmetries from the leaves of the simulated tree. The root expression  $c_1$  is drawn from a normal distribution with zero mean and unit variance. The expression profiles of other cells are generated recursively by adding differential expression patterns  $\delta_i$ , which are also normally distributed. (All random number are drawn independently.) The determination (squared correlation) was measured between between the true and reconstructed asymmetries (blue), and true and reconstructed expressions (orange). **d** Progenies group naturally in brain space according to their ancestry. Shown is a 2D simulation of growing tissue, started from a single root, only constrained to not detach from one another and not pass through each other.



Figure 4: Navigation of an axon (red branching arrow) through the familial address space. Throughout the figure, similarity in color denotes similarity in gene expression profile. **a** The axon traverses the brain by traversing a sequence of familial states of the lineage tree that is implicit in its genome. The growth cone uses the sequence of familial states as successive search templates in brain space, and so navigates from a source leaf node to a number of target leaves. Familial states (colored circles) correspond to nodes of the encoded lineage tree. For purpose of explanation, the tree is hung from the leaf state corresponding to the axon's source neuron, rather than from its root node as in 3b. Terminal states of leaf (existant) nodes have a solid circumference, while ancestral states in the interior of the tree have a dotted circumference. Transitions between states occur downward, along the arrowed arcs, beginning at the source leaf (red encircled) and ending at (some) other leaves. The original tree root can be recognized as the only state having two edges, rather than three (since the root progenitor has no mitotic parent). **b** Various decision scenarios that the axon encounters during traversal. Each familial state is characterized by a profile of gene expression, whose distribution across all cells peaks at one or more locations in brain space. The gradient of a state in the familial address space is the frequency of encountered cells that test positively for a familial state. By selecting a particular familial template, the growth cone tunes into the corresponding expression gradient and filters out the others. If the tuned gradient is in range, the growth cone follows it to arrive at one of that gradient's peaks (case indicated by [1]). If the tuned gradient is not in range [3], the axonal branch of that growth cones fails. When the axon arrives at a peak, its growth cone tunes to the next downstream familial state, and so on, until a leaf state is found. If multiple downstream states are in range, the axon branches [2], with each branch tuned to one of the possible downstream states. The axon also branches if the gradient is bifurcated by a valley, so that the axon can follow an upward gradient in multiple directions [4]. Each branch pursues a different direction, but in this case they are tipped with growth cones in the same state (unlike the branches in scenario [2].) When a growth cone reaches a leaf state, guidance terminates [5]. **c** Cells have composite genetic identities, with one component (small inner circle) inherited from each ancestor state. The overall state of a leaf cell is the aggregation of these components (3). A growth cone can test whether a cell possesses a component by selecting the familial state template corresponding to that component, and then matching the internally produced gene expression to that of the tested cell. **d** Various regions of the brain correspond to branches of the mitotic lineage tree. Consequently, the regions are nested and each marked by the component of the genetic identity code corresponding to the common progenitor of the region.

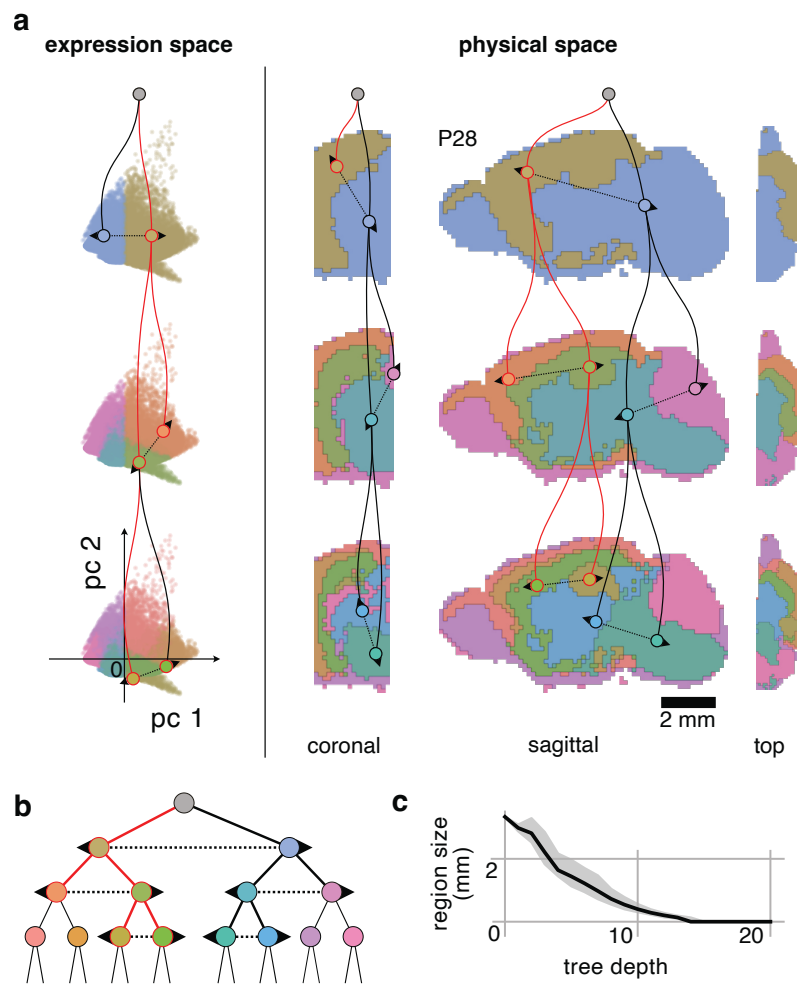

Figure 5: **Hierarchical decomposition of covariance in gene expression space brain is mirrored by a matching decomposition in brain space.** Here the results are for postnatal (P) day 28. The results from further time points can be found in the Supplementary figures. **(a) Expression** Hierarchical decomposition on the collection of voxels in expression space, independent of source location in brain. Decomposition is performed by measuring the first principal component of covariance; then sorting all voxels into two bins, (competing bins indicated by dotted arrows) based on their individual projection coefficients. This process is repeated recursively on each of the resulting bins, until a bin contains only a single voxel remains (Figure shows only the first 3 generations of the resulting hierarchy). **Physical Space** Same voxel bins and coloring, but voxels now positioned at their source locations in brain. Coronal and horizontal sections are shown: the color of each pixel indicates the most common bin in the occluded direction for that pixel. Horizontal section (labeled top) is drawn at a smaller scale. Multi-scale spatially coherent covariance patterns are present. Two example branches of the hierarchy are indicated with red and black curves. **(b)** Hierarchy of bins of the hierarchical decomposition. The bins are colored to represent the hierarchy: the parent bin has the average hue of the child bins. This coloring is applied throughout the paper. **(c)** Although regions are nested by construction (hierarchical decomposition), we quantified the extent to which the regions are also continuous by measuring their spatial spread (average distance from the region centroid) as a function of their depth in the hierarchy. At the root of the hierarchy the spatial spread covers the entire brain, and we expect that as the depth increases the spatial spread (i.e. the mean distance from the region centroid to the constituent voxels) decreases. To make the different time points and simulation comparable we present the spreads as a fraction of the root spread. The solid line indicates the median spread over all regions at that depth, and the gray area the first (below) and third (above) quartiles. As expected, the mean distance from the centroid decreases as the regions become more resolved at with depth.

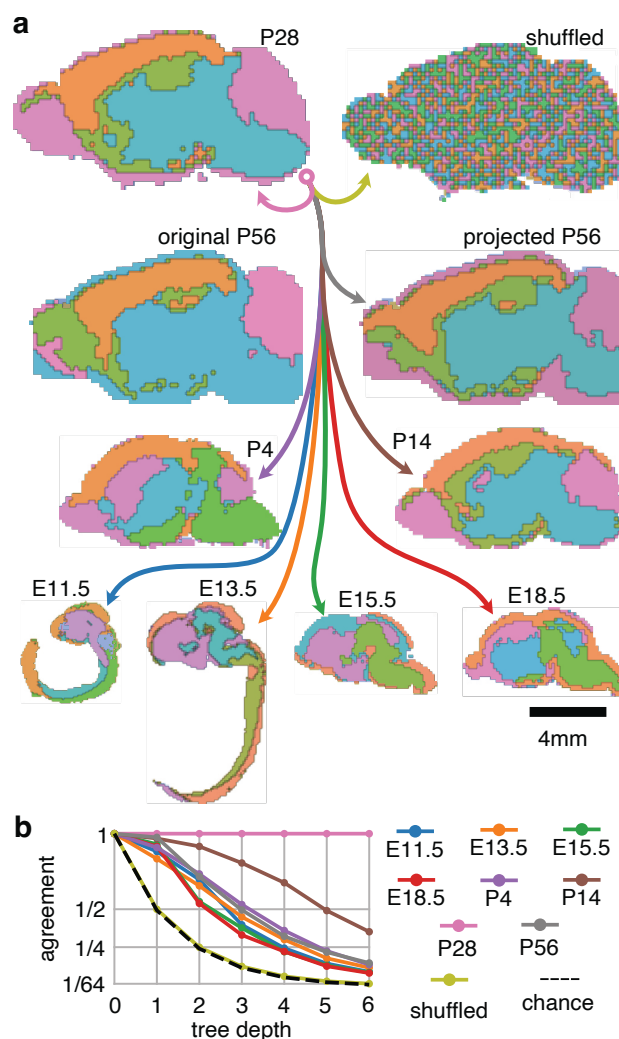

Figure 6: The root asymmetry measured at P28 is projected to the other available embryonic and post-natal developmental time points, and compared to the root asymmetry measured at the respective time point. **(a)** First division of the hierarchy, but the direction of variance used to sort the bins is derived from P28, rather than from the data of the time point itself (except Original P56). This temporally projected pattern only has small differences with the patterns derived from the original data (compare Original P56 to Projected P56). When the expression data is shuffled over voxels and genes, maintaining pooled expression statistics but destroying covariance structure, all spatial patterning disappears. Images are proportional to their actual brain sizes. **(b)** Quantification of the agreement between the original and projected hierarchy, measured as the proportion of voxels in matching bins, at different levels in the hierarchy. (Although the images in **a** are 2D, quantification is done on the 3D voxels.) The number of possible bins grows exponentially with tree depth, and so chance level decreases inverse-proportionally (dashed line), quantitatively verified by the shuffled case (yellow line). P28 projects onto itself, and is hence in perfect agreement. The other time points show an agreement consistently above chance. Consider that a mismatch at a shallow depth cannot be corrected at a deeper depth, and so mismatch can only accumulate.



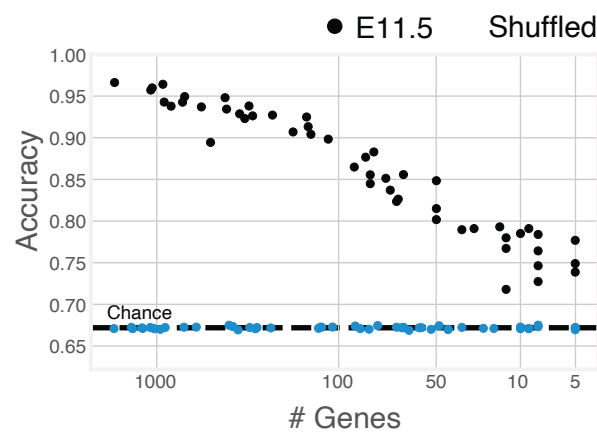

Figure 7: Random sets of genes of various sizes from embryonic age E11.5 were selected, and the spatial hierarchy they exhibit was compared to the hierarchy exhibited by the grand set of all genes at hierarchy. To compare hierarchies all voxels are projected onto both hierarchies. For each matching choice the score is incremented proportionally to the depth of the bin. As such, 1 indicates that the all voxels are sorted into corresponding nodes of the hierarchies, and the dotted line indicates the score if all voxels were sorted into hierarchical bins randomly (as in the shuffled case). The hierarchy established from a set of 20 random genes already agrees largely above chance with the original pattern.

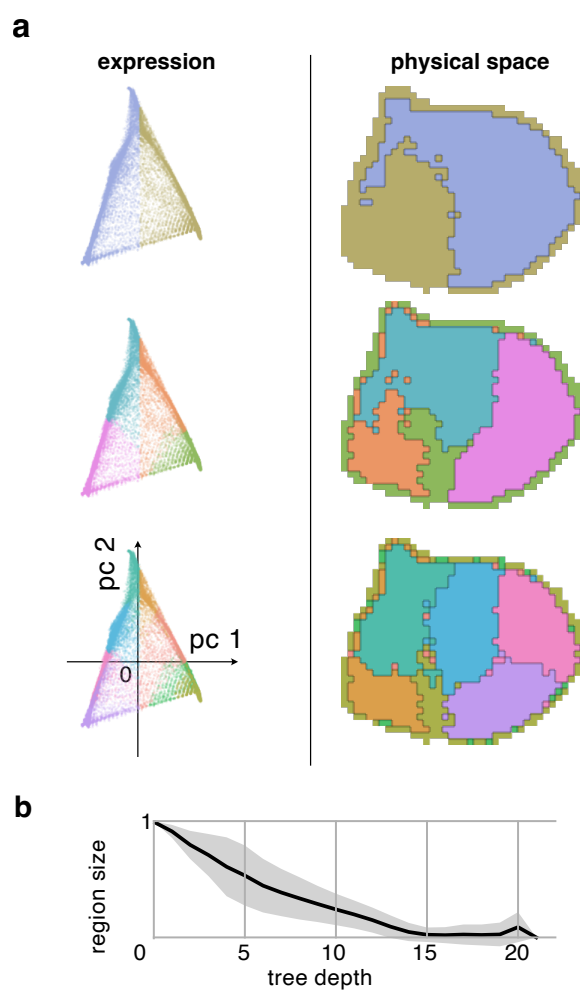

Figure 8: Hierarchical decomposition of expression data generated by simulation of the model (see text) proposed to explain the results. Simulated ‘brain’ sphere composed of voxelated leaf cells was generated by 300,000 mitoses distributed over 10 independent lineages. Cells express 500 genes. Asymmetrical mitoses induce differential changes in gene expression. Each voxel contains  $3 \times 3 \times 3 = 27$  adjacent cells. Similar to experimental results, the hierarchical decomposition of covariance in gene expression voxels independent of location (left), is mirrored by matching decomposition in space (right).

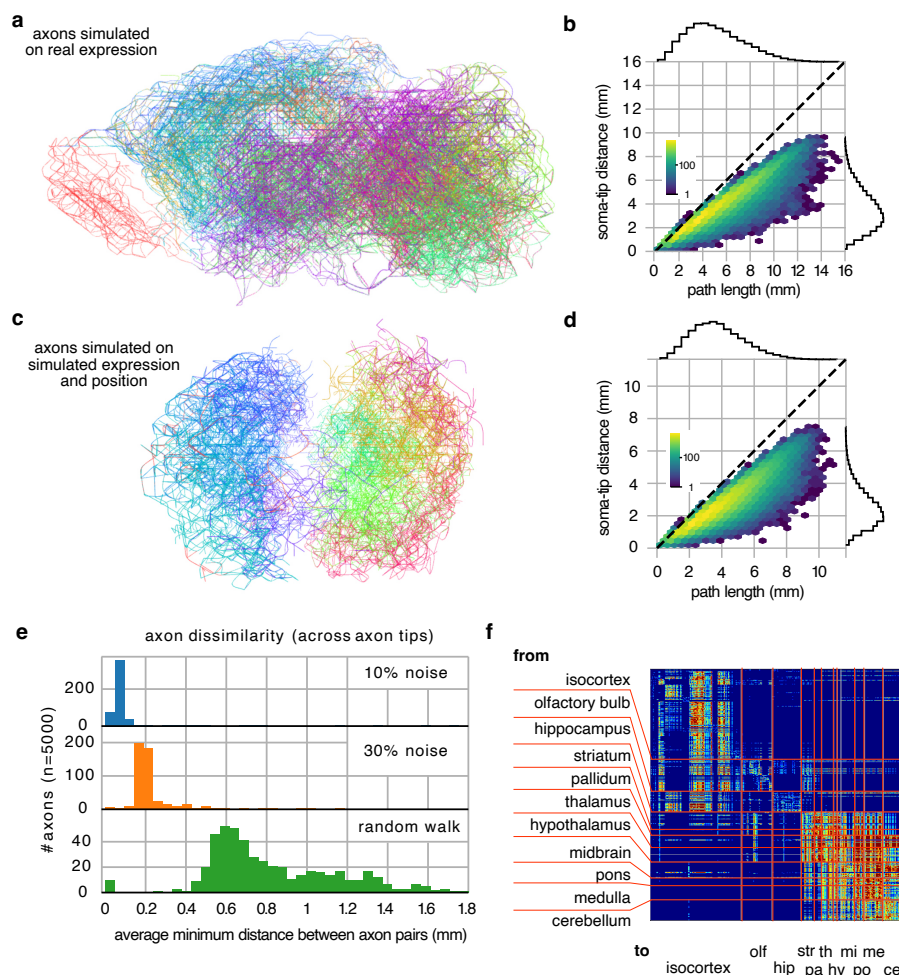

Figure 9: Simulated axons use familial guidance to navigate through the voxels of the ABI Developing Mouse Brain gene expression atlas. **a** Arborizations of 50 example axons, show in a sagittal projection of the ABI atlas. Each arbor is the collection of all branches that an axon could potentially navigate using this gene expression space. Each axon is colored according to its source region. The colorings correspond to those of Figure 5b. **b** Straight-line distance between the beginning of a branch (soma) and end of that branch (top) versus the actual path length. Branches are points sorted in hexagonal 2D bins, whose color intensity indicates the number of branches in that bin. **c** Same as **a** but on a tissue grown in simulation (as in Figure 8). **d** As **b**, but for the simulated tissue of **c**. **e** The dissimilarity between axons beginning from the same voxel (measured as average minimum distance), under varying levels (10% or 30%) of expression noise. (Because the navigation algorithm is deterministic the 0% noise case produces identical neurons.) The familial guidance dissimilarity is compared against a random walk axon of the same path length. **f** Connectivity matrix corresponding to the connections made by the axons of **a**. The connections conform to reasonable anatomical patterns. The anatomical regions marked on the matrix are taken from the annotations of the Allen Brain Institute. They are not used for the analysis.

637 **References**

- 638 [1] Francisco Aboitiz and Juan F. Montiel. “Morphological Evolution of the Vertebrate Forebrain: From Mechanical to  
639 Cellular Processes”. In: *Evolution & Development* 21.6 (2019), pp. 330–341. ISSN: 1525-142X. DOI: 10.1111/ede.12308.
- 640 [2] Detlev Arendt, Maria Antonietta Tosches, and Heather Marlow. “From Nerve Net to Nerve Ring, Nerve Cord and  
641 Brain — Evolution of the Nervous System”. In: *Nature Reviews Neuroscience* 17.1 (Jan. 2016), pp. 61–72. ISSN:  
642 1471-0048. DOI: 10.1038/nrn.2015.15.
- 643 [3] Roman Bauer, Gavin J Clowry, and Marcus Kaiser. “Creative Destruction: A Basic Computational Model of Cortical  
644 Layer Formation”. In: *Cerebral Cortex* 31.7 (June 2021), pp. 3237–3253. ISSN: 1047-3211, 1460-2199. DOI: 10.1093/  
645 *cercor*/bhab003.
- 646 [4] Roman Bauer et al. “Developmental Self-Construction and -Configuration of Functional Neocortical Neuronal Net-  
647 works”. In: *PLOS Computational Biology* 10.12 (Dec. 2014), e1003994. ISSN: 1553-7358. DOI: 10.1371/journal.pcbi.  
648 1003994.
- 649 [5] Anais Bellon and Fanny Mann. “Keeping up with Advances in Axon Guidance”. In: *Current Opinion in Neurobiology*.  
650 Developmental Neuroscience 53 (Dec. 2018), pp. 183–191. ISSN: 0959-4388. DOI: 10.1016/j.conb.2018.09.004.
- 651 [6] Isabel Yasmin Buchsbaum and Silvia Cappello. “Neuronal Migration in the CNS during Development and Disease:  
652 Insights from in Vivo and in Vitro Models”. In: *Development* 146.1 (Jan. 2019). ISSN: 0950-1991. DOI: 10.1242/dev.  
653 163766.
- 654 [7] Santiago Ramon y Cajal, Neely Swanson, and Larry W. Swanson. *Cajal’s Histology of the Nervous System of Man  
655 and Vertebrates*. History of Neuroscience. Oxford, New York: Oxford University Press, Apr. 1995. ISBN: 978-0-19-  
656 507401-7.
- 657 [8] Lee Cossell et al. “Functional Organization of Excitatory Synaptic Strength in Primary Visual Cortex”. In: *Nature*  
658 518.7539 (Feb. 2015), pp. 399–403. ISSN: 1476-4687. DOI: 10.1038/nature14182.
- 659 [9] Irene Dalla Costa et al. “The Functional Organization of Axonal mRNA Transport and Translation”. In: *Nature*  
660 *Reviews Neuroscience* 22.2 (Feb. 2021), pp. 77–91. ISSN: 1471-0048. DOI: 10/gnrsrg.
- 661 [10] E. W. Dijkstra. “A Note on Two Problems in Connexion with Graphs”. In: *Numerische Mathematik* 1.1 (Dec. 1959),  
662 pp. 269–271. ISSN: 0945-3245. DOI: 10/dpvk8c.
- 663 [11] Sven O. E. Ebbesson. “Evolution and Ontogeny of Neural Circuits”. In: *Behavioral and Brain Sciences* 7.3 (Sept.  
664 1984), pp. 321–331. ISSN: 0140-525X, 1469-1825. DOI: 10/fk5mpc.
- 665 [12] Jennifer Stine Elam et al. “The Human Connectome Project: A Retrospective”. In: *NeuroImage* 244 (Dec. 2021),  
666 p. 118543. ISSN: 1053-8119. DOI: 10.1016/j.neuroimage.2021.118543.
- 667 [13] Mária Ercsey-Ravasz et al. “A Predictive Network Model of Cerebral Cortical Connectivity Based on a Distance  
668 Rule”. In: *Neuron* 80.1 (Oct. 2013), pp. 184–197. ISSN: 0896-6273. DOI: 10.1016/j.neuron.2013.07.036.
- 669 [14] D. Friedmann-Morvinski et al. “Dedifferentiation of Neurons and Astrocytes by Oncogenes Can Induce Gliomas in  
670 Mice”. In: *Science* 338.6110 (Nov. 2012), pp. 1080–1084. ISSN: 1095-9203. DOI: 10/f4d2w5.
- 671 [15] K. Ruben Gabriel and Robert R. Sokal. “A New Statistical Approach to Geographic Variation Analysis”. In: *Sys-  
672 tematic Zoology* 18.3 (Sept. 1969), p. 259. ISSN: 00397989. DOI: 10/fshrd8.
- 673 [16] Răzvan Gămănuț et al. “The Mouse Cortical Connectome, Characterized by an Ultra-Dense Cortical Graph, Main-  
674 tains Specificity by Distinct Connectivity Profiles”. In: *Neuron* 97.3 (Feb. 2018), 698–715.e10. ISSN: 0896-6273. DOI:  
675 10.1016/j.neuron.2017.12.037.

REFERENCES

REFERENCES

- 676 [17] Geoffrey J. Goodhill. “Can Molecular Gradients Wire the Brain?” In: *Trends in Neurosciences* 39.4 (Apr. 2016),  
677 pp. 202–211. ISSN: 0166-2236. DOI: 10.1016/j.tins.2016.01.009.
- 678 [18] Pascal Grange et al. “Cell-Type-Based Model Explaining Coexpression Patterns of Genes in the Brain”. In: *Proceed-*  
679 *ings of the National Academy of Sciences of the United States of America* 111.14 (Apr. 2014), pp. 5397–5402. ISSN:  
680 1091-6490. DOI: 10.1073/pnas.1312098111.
- 681 [19] Michael J. Hawrylycz et al. “An Anatomically Comprehensive Atlas of the Adult Human Brain Transcriptome”. In:  
682 *Nature* 489.7416 (Sept. 2012), pp. 391–399. ISSN: 1476-4687. DOI: 10.1038/nature11405.
- 683 [20] Francesca Ieva, Anna Maria Paganoni, and Nicholas Tarabelloni. “Covariance-Based Clustering in Multivariate and  
684 Functional Data Analysis”. In: *Journal of Machine Learning Research* 17.143 (2016), pp. 1–21. ISSN: 1533-7928.
- 685 [21] Marcus Kaiser. “Mechanisms of Connectome Development”. In: *Trends in Cognitive Sciences* 21.9 (Sept. 2017),  
686 pp. 703–717. ISSN: 13646613. DOI: 10.1016/j.tics.2017.05.010.
- 687 [22] Pegah Kassraian-Fard, Michael Pfeiffer, and Roman Bauer. “A Generative Growth Model for Thalamocortical Axonal  
688 Branching in Primary Visual Cortex”. In: *PLOS Computational Biology* 16.2 (Feb. 2020). Ed. by Geoffrey J Goodhill,  
689 e1007315. ISSN: 1553-7358. DOI: 10/ggr4n7.
- 690 [23] Lennart Kester and Alexander van Oudenaarden. “Single-Cell Transcriptomics Meets Lineage Tracing”. In: *Cell Stem*  
691 *Cell* 23.2 (Aug. 2018), pp. 166–179. ISSN: 1875-9777. DOI: 10.1016/j.stem.2018.04.014.
- 692 [24] Alex L. Kolodkin and R. Jeroen Pasterkamp. “SnapShot: Axon Guidance II”. In: *Cell* 153.3 (Apr. 2013), 722–722.e1.  
693 ISSN: 0092-8674. DOI: 10/gd6fq2.
- 694 [25] Lulu I. T. Korsak et al. “Regulation of Neuronal Gene Expression by Local Axonal Translation”. In: *Current Genetic*  
695 *Medicine Reports* 4.1 (Mar. 2016), pp. 16–25. ISSN: 2167-4876. DOI: 10/gnsh2s.
- 696 [26] Alexei Koulakov, Sergey Shuvaev, and Anthony Zador. *Encoding Innate Ability through a Genomic Bottleneck*.  
697 Preprint. Neuroscience, Mar. 2021. DOI: 10.1101/2021.03.16.435261.
- 698 [27] Ye Li et al. “Clonally Related Visual Cortical Neurons Show Similar Stimulus Feature Selectivity”. In: *Nature* 486.7401  
699 (June 2012), pp. 118–121. ISSN: 1476-4687. DOI: 10.1038/nature11110.
- 700 [28] Patricia F. Maness and Melitta Schachner. “Neural Recognition Molecules of the Immunoglobulin Superfamily:  
701 Signaling Transducers of Axon Guidance and Neuronal Migration”. In: *Nature Neuroscience* 10.1 (Jan. 2007), pp. 19–  
702 26. ISSN: 1546-1726. DOI: 10.1038/nn1827.
- 703 [29] N. T. Markov et al. “A Weighted and Directed Interareal Connectivity Matrix for Macaque Cerebral Cortex”. In:  
704 *Cerebral Cortex* 24.1 (Jan. 2014), pp. 17–36. ISSN: 1047-3211. DOI: 10.1093/cercor/bhs270.
- 705 [30] Allyson J. Merrell and Ben Z. Stanger. “Adult Cell Plasticity in Vivo: De-Differentiation and Transdifferentiation  
706 Are Back in Style”. In: *Nature Reviews Molecular Cell Biology* 17.7 (July 2016), pp. 413–425. ISSN: 1471-0080. DOI:  
707 10/f8rmzh.
- 708 [31] Ronald L Meyer. “Roger Sperry and His Chemoaffinity Hypothesis”. In: *Neuropsychologia* 36.10 (Oct. 1998), pp. 957–  
709 980. ISSN: 0028-3932. DOI: 10/c3rjjz.
- 710 [32] Alexandra Neuhaus-Follini and Greg J. Bashaw. “Crossing the Embryonic Midline: Molecular Mechanisms Regulating  
711 Axon Responsiveness at an Intermediate Target”. In: *WIREs Developmental Biology* 4.4 (2015), pp. 377–389. ISSN:  
712 1759-7692. DOI: 10.1002/wdev.185.
- 713 [33] John Neumann von. *Theory of Self-Reproducing Automata*. Ed. by Arthur W Burks. Urbana and London: University  
714 of Illinois Press, 1966. ISBN: 978-0-598-37798-2.
- 715 [34] Lydia Ng et al. “An Anatomic Gene Expression Atlas of the Adult Mouse Brain”. In: *Nature Neuroscience* 12.3 (Mar.  
716 2009), pp. 356–362. ISSN: 1546-1726. DOI: 10.1038/nn.2281.

REFERENCES

REFERENCES

- 717 [35] Seung Wook Oh et al. “A Mesoscale Connectome of the Mouse Brain”. In: *Nature* 508.7495 (Apr. 2014), pp. 207–214.  
718 ISSN: 1476-4687. DOI: 10.1038/nature13186.
- 719 [36] David J Price et al. *Building Brains: An Introduction to Neural Development*. 2018. ISBN: 978-1-119-29389-7.
- 720 [37] Luis Puelles. “Brain Segmentation and Forebrain Development in Amniotes”. In: *Brain Research Bulletin* 55.6 (Aug.  
721 2001), pp. 695–710. ISSN: 0361-9230. DOI: 10.1016/s0361-9230(01)00588-3.
- 722 [38] Luis Puelles and José Ferran. “Concept of Neural Genoarchitecture and Its Genomic Fundament”. In: *Frontiers in*  
723 *Neuroanatomy* 6 (2012), p. 47. ISSN: 1662-5129. DOI: 10.3389/fnana.2012.00047.
- 724 [39] Luis Puelles and John L. R. Rubenstein. “Forebrain Gene Expression Domains and the Evolving Prosomeric Model”.  
725 In: *Trends in Neurosciences* 26.9 (Sept. 2003), pp. 469–476. ISSN: 0166-2236. DOI: 10.1016/s0166-2236(03)00234-0.
- 726 [40] Michael W. Reimann et al. “A Null Model of the Mouse Whole-Neocortex Micro-Connectome”. In: *Nature Commu-*  
727 *nications* 10.1 (Aug. 2019), p. 3903. ISSN: 2041-1723. DOI: 10.1038/s41467-019-11630-x.
- 728 [41] William J. Rosoff et al. “A New Chemotaxis Assay Shows the Extreme Sensitivity of Axons to Molecular Gradients”.  
729 In: *Nature Neuroscience* 7.6 (June 2004), pp. 678–682. ISSN: 1546-1726. DOI: 10.1038/nn1259.
- 730 [42] John L. R. Rubenstein and Pasko Rakic. *Patterning and Cell Type Specification in the Developing CNS and PNS*.  
731 Elsevier, 2013. ISBN: 978-0-12-397265-1. DOI: 10.1016/C2011-0-07685-8.
- 732 [43] Dan Harvey Sanes et al. *Development of the Nervous System*. Fourth edition. London, United Kingdom ; San Diego,  
733 CA, United States: Academic Press, an imprint of Elsevier, 2019. ISBN: 978-0-12-803996-0.
- 734 [44] Louis K. Scheffer et al. “A Connectome and Analysis of the Adult Drosophila Central Brain”. In: *eLife* 9 (Sept. 2020),  
735 e57443. ISSN: 2050-084X. DOI: 10.7554/eLife.57443.
- 736 [45] Elena Seiradake, E. Yvonne Jones, and Rüdiger Klein. “Structural Perspectives on Axon Guidance”. In: *Annual*  
737 *Review of Cell and Developmental Biology* 32.1 (Oct. 2016), pp. 577–608. ISSN: 1081-0706. DOI: 10.1146/annurev-  
738 cellbio-111315-125008.
- 739 [46] Marcus Singer, Ruth H. Nordlander, and Margaret Egar. “Axonal Guidance during Embryogenesis and Regenera-  
740 tion in the Spinal Cord of the Newt: The Blueprint Hypothesis of Neuronal Pathway Patterning”. In: *Journal of*  
741 *Comparative Neurology* 185.1 (1979), pp. 1–21. ISSN: 1096-9861. DOI: 10/dh4f27.
- 742 [47] Austen A. Sitko and Carol A. Mason. “Organization of Axons in Their Tracts”. In: *Axons and Brain Architecture*.  
743 Ed. by Kathleen S. Rockland. San Diego: Academic Press, Jan. 2016, pp. 267–288. ISBN: 978-0-12-801393-9. DOI:  
744 10.1016/B978-0-12-801393-9.00013-X.
- 745 [48] R. W. Sperry. “Chemoaffinity in the Orderly Growth of Nerve Fiber Patterns and Connections”. In: *Proceedings of*  
746 *the National Academy of Sciences* 50.4 (Oct. 1963), pp. 703–710. ISSN: 0027-8424. DOI: 10.1073/pnas.50.4.703.
- 747 [49] Olaf Sporns. “Cerebral Cartography and Connectomics”. In: *Philosophical Transactions of the Royal Society B:*  
748 *Biological Sciences* 370.1668 (May 2015), p. 20140173. DOI: 10.1098/rstb.2014.0173.
- 749 [50] Esther T. Stoeckli. “Understanding Axon Guidance: Are We Nearly There Yet?” In: *Development* 145.10 (May 2018).  
750 ISSN: 0950-1991. DOI: 10.1242/dev.151415.
- 751 [51] Carol L. Thompson et al. “A High-Resolution Spatiotemporal Atlas of Gene Expression of the Developing Mouse  
752 Brain”. In: *Neuron* 83.2 (July 2014), pp. 309–323. ISSN: 0896-6273. DOI: 10.1016/j.neuron.2014.05.033.
- 753 [52] Arthur W. Toga et al. “Mapping the Human Connectome”. In: *Neurosurgery* 71.1 (July 2012), pp. 1–5. ISSN: 0148-  
754 396X. DOI: 10.1227/neu.0b013e318258e9ff.
- 755 [53] Daniel E. Wagner and Allon M. Klein. “Lineage Tracing Meets Single-Cell Omics: Opportunities and Challenges”.  
756 In: *Nature Reviews Genetics* 21.7 (July 2020), pp. 410–427. ISSN: 1471-0064. DOI: 10.1038/s41576-020-0223-2.

REFERENCES

REFERENCES

- 757 [54] Caleb Weinreb and Allon M. Klein. “Lineage Reconstruction from Clonal Correlations”. In: *Proceedings of the Na-*  
758 *tional Academy of Sciences* 117.29 (July 2020), pp. 17041–17048. ISSN: 1091-6490. DOI: 10.1073/pnas.2000238117.
- 759 [55] Dianna E. Willis et al. “Extracellular Stimuli Specifically Regulate Localized Levels of Individual Neuronal mRNAs”.  
760 In: *Journal of Cell Biology* 178.6 (Sept. 2007), pp. 965–980. ISSN: 0021-9525. DOI: 10/bgzdbt.
- 761 [56] D. J. Willshaw, C. Von Der Malsburg, and Hugh Christopher Longuet-Higgins. “How Patterned Neural Connections  
762 Can Be Set up by Self-Organization”. In: *Proceedings of the Royal Society of London. Series B. Biological Sciences*  
763 194.1117 (Nov. 1976), pp. 431–445. DOI: 10.1098/rspb.1976.0087.
- 764 [57] Yongchang Yao and Chunming Wang. “Dedifferentiation: Inspiration for Devising Engineering Strategies for Regen-  
765 erative Medicine”. In: *npj Regenerative Medicine* 5.1 (July 2020), pp. 1–11. ISSN: 2057-3995. DOI: 10/gnshz5.
- 766 [58] Yong-Chun Yu et al. “Preferential Electrical Coupling Regulates Neocortical Lineage-Dependent Microcircuit As-  
767 sembly”. In: *Nature* 486.7401 (June 2012), pp. 113–117. ISSN: 1476-4687. DOI: 10.1038/nature10958.
- 768 [59] Yong-Chun Yu et al. “Specific Synapses Develop Preferentially among Sister Excitatory Neurons in the Neocortex”.  
769 In: *Nature* 458.7237 (Mar. 2009), pp. 501–504. ISSN: 1476-4687. DOI: 10.1038/nature07722.
- 770 [60] Rafael Yuste et al. “A Community-Based Transcriptomics Classification and Nomenclature of Neocortical Cell Types”.  
771 In: *Nature Neuroscience* 23.12 (Dec. 2020), pp. 1456–1468. ISSN: 1546-1726. DOI: 10.1038/s41593-020-0685-8.
- 772 [61] Anthony M. Zador. “A Critique of Pure Learning and What Artificial Neural Networks Can Learn from Animal  
773 Brains”. In: *Nature Communications* 10.1 (Dec. 2019), p. 3770. ISSN: 2041-1723. DOI: 10.1038/s41467-019-11786-6.
- 774 [62] Zhihao Zheng et al. “A Complete Electron Microscopy Volume of the Brain of Adult *Drosophila Melanogaster*”. In:  
775 *Cell* 174.3 (July 2018), 730–743.e22. ISSN: 0092-8674. DOI: 10.1016/j.cell.2018.06.019.
- 776 [63] Frederic Zubler and Rodney Douglas. “A Framework for Modeling the Growth and Development of Neurons and  
777 Networks”. In: *Frontiers in Computational Neuroscience* 3 (2009). ISSN: 1662-5188. DOI: 10.3389/neuro.10.025.2009.
- 778 [64] Frederic Zubler et al. “An Instruction Language for Self-Construction in the Context of Neural Networks”. In:  
779 *Frontiers in Computational Neuroscience* 5 (2011), p. 57. ISSN: 1662-5188. DOI: 10.3389/fncom.2011.00057.
- 780 [65] Frederic Zubler et al. “Simulating Cortical Development as a Self Constructing Process: A Novel Multi-Scale Approach  
781 Combining Molecular and Physical Aspects”. In: *PLoS Computational Biology* 9.8 (Aug. 2013), e1003173. ISSN: 1553-  
782 7358. DOI: 10.1371/journal.pcbi.1003173.

## 783 **Data availability**

784 All experimental data analyzed in this paper were originally published by the Allen Institute for Brain  
785 Science [51], and are available at <https://developingmouse.brain-map.org>.

## 786 **Code availability**

787 All custom code is available at ...(will be added with paper publication)

## 788 **Acknowledgements**

789 The authors acknowledge the Allen Institute for Brain Science for their mission to bring systematic  
790 neurobiological datasets to the public domain. Without their work, the research reported here would  
791 not have been possible. The authors also thank, Bruno Averbeck, Florian Engert, Richard Hahnloser,  
792 Denis Jabaudon, Henry Kennedy, Sepp Kollmorgen, Kevan Martin, David Price, and Saray Soldado for  
793 discussions and comments regarding an earlier version of this manuscript. This work was supported by  
794 ETH-24 19-02. The authors also thank Prof. Dr. Tobias Delbrück for support.

## 795 **Author Contributions**

796 Data acquisition SK, GM; Analysis of data SK, GM; Simulations SK; Theory SK, RD; Wrote the paper  
797 RD, SK, GM; All authors revised and edited the completed document; Proposed the study RD, GM.



---

## 798 Methods

### 799 Experimental Data

800 The analyzed gene expression data were published by the ABI in their Developing Mouse Brain Atlas [51].  
801 The data are provided as 3D grids of isotropic voxels of various sizes. The expression energies of the  
802 ~2000 genes were measured by *in situ* hybridization and take any non-negative value, while -1 indicates an  
803 invalid measurement in that voxel. ‘Expression energy’ is a combined measure of density and intensity.  
804 The voxel dimensions are 80  $\mu\text{m}$ , 100  $\mu\text{m}$ , 120  $\mu\text{m}$ , 140  $\mu\text{m}$  and 160  $\mu\text{m}$  for developmental time points  
805 E11.5, E13.5, E15.5, E18.5, and P4, respectively, and at later time points, i.e. P14, P28 and P56, the  
806 voxel dimension remains constant at 200  $\mu\text{m}$  [51]. Every voxel thus contains the cumulative expression  
807 of many (probably thousands) cells.

808 The atlas data was retrieved through the API provided by ABI. The ABI expression grids were used as  
809 published, without performing any additional re-sampling or interpolation (see below for preprocessing).  
810 Thus, the voxel sizes were maintained as published by the ABI.

811 Only measurements from sagittal sections that were not labeled as failed images were used (omitting  
812 failed and coronal sections). When multiple successful experiments were available for a particular gene  
813 at a particular time point, one of the experiments was selected arbitrarily.

814 From the 3D expression grids, only those voxels labeled (by the ABI) as part of the neural plate were  
815 selected. This includes all developmental derivatives of the neural plate, i.e. voxels of brain and spinal  
816 cord tissue, but omits those of ventricles and empty space. All individual voxels that have more than  
817 20% invalid measurements and all genes that have more than 20% invalid values across all remaining  
818 voxels at every of the developmental time points (in that order) were removed from the analysis. In this  
819 way, the same set of 1240 genes was selected for each of the time points. The number of selected voxels  
820 are 7377, 12266, 11869, 11639, 21348, 24224, 28476, and 60129, for the time points E11.5, E13.5, E15.5,  
821 E18.5, P4, P14, P28, and P56, respectively.

822 To avoid the introduction of spatial confounds, the ABI recommendation to spatially interpolate  
823 remaining invalid expression values was not applied. Instead, missing values were replaced with the  
824 mean expression value of that gene over all voxels at that developmental time. Thus, when the data is  
825 later centered for analysis the invalid expression values become 0.

826 In order to make the gene expression energy levels roughly comparable across genes, the expression  
827 values were normalized to unit variance and zero mean over the voxels at that developmental time.

## 828 Hierarchical Decomposition

829 The voxels measured at one time point are sorted into the leaves of an estimated lineage tree through our  
830 hierarchical decomposition procedure. The procedure starts at the root of the tree, to which all voxels  
831 are initially assigned. Each iteration of the procedure evaluates the voxels assigned to a node of the tree,  
832 and reassigns each voxel to one of the node's two daughters. The procedure stops once every leaf node  
833 is assigned exactly a single voxel.

834 An iteration considers the gene expression of the voxels assigned to a node. The collected expression  
835 can be expressed as a matrix  $X$ , where each row corresponds to a voxel and each column to a gene. The  
836 voxels will be split over the daughter nodes along the axis of greatest variance.

837 The axis of greatest variance is the eigenvector corresponding to the greatest eigenvalue of the covari-  
838 ance matrix. The covariance matrix is computed by first centering the data by subtracting the empirical  
839 mean from each column  $X'_{ij} = X_{ij} - \sum_k X_{kj}/n$ , where  $X_{ij}$  is expression of the  $j$ th gene (column) in the  
840  $i$ th voxel (row), and  $n$  is the total number of voxels (rows). The covariance matrix is then  $Q = X'^T X'$ .

841 The main axis of covariance is the eigenvector  $\vec{\text{Cov}}$  corresponding to the largest eigenvalue  $\lambda$  such that  
842  $Q \vec{\text{Cov}} = \lambda \vec{\text{Cov}}$ . The eigenvector  $\vec{\text{Cov}}$  corresponds to the first principal component of gene expression  
843 covariance.

844 The coefficient  $w_i$  per voxel  $i$ , obtained by projecting the original data onto the axis of greatest  
845 covariance  $w = X' \vec{\text{Cov}}$  corresponds to the agreement of the voxel's expression content with the axis  $\vec{\text{Cov}}$ .  
846 Based on these coefficient we sort the voxels into two subsets, namely one set (arbitrarily denoted  $L$  for  
847 left) with  $L = \{i | w_i < 0\}$ , and  $R = \{i | w_i > 0\}$ . These voxels of these sets are assigned to the left and  
848 right daughter nodes, respectively. The decomposition procedure is then repeated recursively on these  
849 two daughter nodes.

850 If a node is assigned only a single voxel, the process terminates for that branch. The process as a  
851 whole terminates when all branches have terminated.

## 852 Controls

853 Controls were performed to ensure that the observed spatial patterns are due to the spatial distribution  
854 of experimental gene expression rather than being due to any inherent properties of the analyses. The  
855 null-hypothesis for the spatial patterning of expression covariance is that gene expression covariance is  
856 not spatially organized. In our control case, all gene expression values were permuted randomly across  
857 voxels and genes. This ensures that the overall statistics of gene expression remained identical, while  
858 removing all spatial structure from the source data. When the analytic workflow was applied to this

859 synthetic data we obtained the results. These results confirm that the development of the mouse brain  
860 is associated with a systematic spatial organization of measured gene expression covariances, and that  
861 this organization is consistent over the period E11.5 through P56 (see Figures 6,S13-S20).

#### 862 **Simulation of Mitotic Model**

863 Our model of cell division was simulated numerically to confirm that constraints on gene regulation and  
864 mobility during cell division indeed induce a hierarchical gene expression address space. It also form one  
865 of the two substrates—next to the gene expression data grids from the ABI—for our simulations of axon  
866 navigation.

867 The division model has three components: a model of gene regulation that determines the expression  
868 profiles of the mitotic daughters at mitosis; a mitotic clock that initiates mitosis at some interval, and  
869 exits the cell cycle after some condition is met; and a rule for the placement of post-mitotic daughter  
870 cells in 3D space. In the minimal version of the model used here, a global clock initiates mitosis after  
871 an interval drawn from a Poisson distribution from the birth of the cell, and the daughters are born  
872 alongside one another along a randomly selected axis in the spatial simulation system described below.

873 A total of 200,000 mitoses distributed over 100 lineage trees, were simulated as follows. First, the  
874 topologies of 100 lineage trees were generated; next gene expressions were assigned to all cells; and  
875 finally the lineages were instantiated in model space. We chose this staged approach to the simulation  
876 for convenience of verification, and analysis. Simulations were written in the Python and C/C++, and  
877 run on a laptop computer. Code and documentation will be available upon publication.

#### 878 **A.4.1 Cellular Gene Expressions**

879 Each model cell has a profile of gene expression, consisting of 500 genes. This profile is expressed  
880 mathematically as a vector of 500 values. For convenience, these values can be both positive and  
881 negative, which can be interpreted as positive or negative deviations from a base expression level.

882 Algorithm 1 describes the assignment of profiles in detail. In brief, the expression profile of each cell  
883 is a random variant of its parent's expression profile.

884 Although randomness is used to establish the expression profiles, the (frozen) random deviations are  
885 used as deterministic process with statistics that are indistinguishable from a random process. This is  
886 analogous to fixing the seed of a random number generator: when the seed is fixed, the exact sequences  
887 of numbers is reproduced, but the statistics still seem random.

888 Of all cell divisions, 20% are symmetric (i.e. the gene expression of the daughter is equal to gene

889 expression of the parent), and the others are asymmetric.

---

**Algorithm 1:** Gene expression

---

**Data:** Set  $C$  of cells organized in a lineage tree; Root cell  $r \in C$ ; Number of genes  $N = 500$ ;

Gaussian random vector  $\mathcal{N}^N(\mu = 0, \sigma = 1)$ ;

Draw  $\mathcal{X}(r) \sim \mathcal{N}^N$ ;

$F \leftarrow \{r\}$ ;

**while**  $|F| > 0$  **do**

    Choose arbitrary  $c \in F$ ;

**if**  $c$  is not a leaf node **then**

**for** daughter  $d$  of  $c$  **do**

**if** with probability 0.2 **then**

$\Delta x \leftarrow \mathbf{0}$ ;

**else**

                Draw  $\Delta x \sim \mathcal{N}^N$ ;

$\mathcal{X}(d) \leftarrow \mathcal{X}(c) + \Delta x$ ;

$F \leftarrow F \cup \{d\}$ ;

$F \leftarrow F - \{c\}$ ;

**Result:** Mapping of cell gene expression profiles  $\mathcal{X} : C \rightarrow \mathbb{R}^N$

---

890 **A.4.2 Mitotic clock**

891 The mitotic clock mechanism generates the lineage trees by deciding when individual cells divide. It  
892 is described in Algorithm 2. When a cell is born, it draws a cell cycle duration from an exponential  
893 distribution (so that the process is Poisson). The division of that cell is then scheduled at the current  
894 global time, plus the drawn duration. At each iteration, the global timer progresses to the cell that  
895 divides next. The algorithm terminates when a fixed number of divisions is reached. Because the  
896 cycle durations are randomly drawn, resulting trees of varying number of nodes and with a generally  
897 unbalanced topology (i.e. branches have different sizes).

898 (The mitotic clock is thus independent of gene expression.)

899 To create multiple lineage trees, the algorithm is still performed only once, but starting not from one,  
900 but from multiple root nodes. So, the total number of divisions is possibly divided unequally over the  
901 lineage trees.

902 **A.4.3 Cellular Locations**

903 The cells of the lineage tree are positioned spatially by Algorithm 3, as illustrated in Figure 10. We  
904 developed this algorithm because it is simpler and more tractable than a direct simulation of soft (or  
905 solid) body physics.

---

**Algorithm 2:** Mitotic clock

---

**Data:** Set  $c \in C$  with  $|C| = 100$  cells; Number of divisions  $D = 200,000$ ; Mapping of division times  $T : C \rightarrow \mathbb{R}^+$ ;  
 $T(c) \leftarrow 0$  for all  $c \in C$ ;  
 $D \leftarrow D - |C|$ ;  
**while**  $D > 0$  **do**  
     $c_{\min} \leftarrow \arg \min_c T(c)$ ;  
    Create two daughters  $c_l$  and  $c_r$  of  $c_{\min}$ ;  
     $C \leftarrow (C - c_{\min}) \cup \{c_l, c_r\}$ ;  
    Draw  $\Delta t, \Delta t' \sim \text{Poisson}(\lambda = 1)$ ;  
     $T(\{c_l, c_r\}) \leftarrow T(c) + \{\Delta t, \Delta t'\}$ ;  
     $D \leftarrow D - 1$ ;

**Result:** Collection of lineage trees with time stamped divisions

---

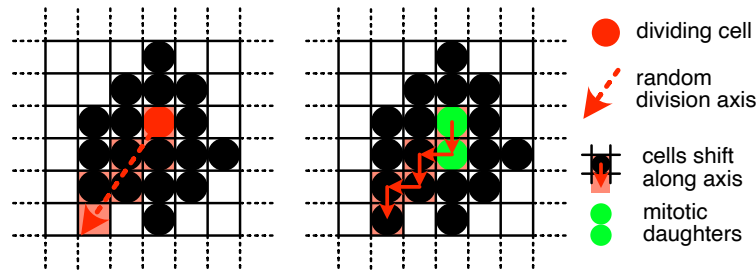

Figure 10: Illustration of cell placement. Although the illustration is 2D, the placement is the same for 3D. When a cell divides a random division axis is drawn uniformly from a unit circle (in 2D) or sphere (in 3D). Then, the sequence of cells that intersect the division axis are shifted along the sequence to create a free slot next to the dividing cell. The mitotic daughters take the original slot of the parent, and the newly created free slot.

---

**Algorithm 3:** Tissue growth

---

**Data:** Unbounded 3D grid  $G$  with slots indexed by  $i, j, k \in \mathbb{Z}$ ; Collection of lineage tree root cells  $c \in C$ ; Mapping of division times  $T : C \rightarrow \mathbb{R}^+$ ;  
Select arbitrary  $c_0 \in C$ ;  
Put  $c_0$  at  $G_{000}$  ;  
**for**  $c \in C - \{c_0\}$  **in arbitrary order do**  
    Put  $c$  in a free slot adjacent to a filled slot;  
**for**  $c \in C$  **in order of ascending**  $T(c)$  **do**  
    **if**  $c$  **is not a leaf node then**  
        Cast a ray  $R$  from  $G(c)$  in a direction drawn from a sphere's surface;  
        **for** filled slot  $G_{ijk}$  **intersecting**  $R$  **in reverse order do**  
            Move the cell in slot  $G_{ijk}$  to the next slot along  $R$ ;  
         $c_l, c_r \leftarrow$  daughters of  $c$ ;  
        Put  $c_l$  in the free slot adjacent to  $c$  along  $R$ ; Replace  $c$  with  $c_r$ ;

**Result:** 3D Grid  $G$  of cells

---

906 **Simulation of Axons**

907 Our Familial Guidance model is simulated virtually, either on the voxel grid of measured expression, or  
908 on a grid of simulated cells.

909 The axon begins in some chosen leaf voxel, and takes as its initial template the expression state of  
910 its leaf voxel. Then, at each step, the growth cone senses the expression of the voxel it occupies, as  
911 well as expressions of the immediately adjacent voxels. The cone then moves into the adjacent voxel  
912 whose expression is most similar to its current template, so extending a new axonal segment between  
913 the traversed voxels. If multiple adjacent voxels contain a favorable expressions, then the growth cone  
914 is cloned, and the axon branches into all of those favorable voxels. Additionally, a cone can change  
915 (irreversibly) its present expression template to a that of an adjacent state up or down the ancestral  
916 lineage tree. The growth cone then repeats its search for favorable translations, on the basis of this new  
917 template. Each cone is constrained not to re-visit voxels already occupied by the cell's axonal arbor  
918 (self-avoidance), and not to re-visit lineage states that it has already visited. The guidance process  
919 terminates when the growth cone can neither move to a more favorable adjacent voxel, nor change lineal  
920 state.

921 In executing this search algorithm, the initial cone and its clones extend axons along all the routes  
922 in brain-space that offer contiguity in brain-space of familial expression patterns encoded in the lineage  
923 tree (Figure 4).

924 For our axonal simulations brain space is discretized: Each spatial position corresponds to a (measured  
925 or simulated) voxel. Spatially adjacent voxels are connected by an edge. These nodes and edges form  
926 a graph encoding the geometry of the brain. The 3D positions of the nodes are used to establish the  
927 spatial graph, but ignored thereafter.

928 The adjacency of nodes is established through a Gabriel tessellation, which is a subgraph of the  
929 Delaunay tessellation [15]. In a Gabriel tessellation a edge of the Delaunay tessellation is kept only if the  
930 sphere of which the edge is the diameter contains no other points. This criterion ensures the spatial graph  
931 is connected, but that there are no edges across large empty spaces, such as ventricles and contours. This  
932 is an improvement over the vanilla Delaunay tessellation, which always contains the convex hull of the  
933 points, and therefore connects, for example, the rostral tip of the olfactory bulb to the cortex.

934 To navigate, axons follow signals on the spatial graph. A signal on a graph is a scalar value associated  
935 with each node, and the gradient of the signal is a value associated with an edge, that is the difference  
936 between the values of the nodes. The gradient depends on the direction the edge is traversed, and swaps

937 sign if the edge is traversed in the reverse direction.

938 The signal for a growth cone depends on the current state of the growth cone, and the expression of  
939 the nodes of the graph. The state of the growth cone is a profile of gene expression that corresponds to  
940 a node in the lineage tree. The signal over the nodes of the spatial graph relative to a growth cone state  
941 is the correlation between the growth cone state's expression profile, and each node's expression.

942 For efficiency, the signal is only allowed to exist in the progeny of the ancestor whose state the growth  
943 cone has adopted. This constraint reduces the search space of the growth cone significantly, without  
944 significantly changing the routes taken by the growth cones.

945 The prominent action of the growth cone is to climb this signal by spatially moving across the graph,  
946 each time moving in the direction of positive gradient. If the signal value cannot be improved through  
947 moving, the growth cone has reached a (local) optimum.

948 In addition to moving, the growth cone can also change state. The state machine governing the  
949 transitions the growth cone can take is (isomorphic to) the lineage tree, which is estimated through our  
950 hierarchical decomposition. So, the growth cone can only transition to the parent state, or either of the  
951 daughter states, of its current state.

952 To simulate this process, a spatial-state graph is constructed. The nodes of the spatial-state graph  
953 are the Cartesian product of all spatial nodes, and all states. The nodes of this graph are connected if  
954 either the nodes are spatially adjacent, and have identical states, or if the nodes are spatially identical  
955 and have adjacent states in the lineage tree.

956 On the spatial-state graph there is only a single guidance signal, attributing to each node the corre-  
957 lation between the node state's expression profile and node's expression.

958 The navigation of an axon starting from a voxel is simulated by executing Dijkstra's algorithm [10]  
959 from a source node in the spatial-state graph to all possible nodes containing leaf states, allowing only  
960 movements along positive gradients. For graph implementations the `igraph` library with python bindings  
961 was used (<https://igraph.org>).

962 Axons were visualized using `threejs` (<https://threejs.org>)

<sup>963</sup> **Supplementary Figures**



B SUPPLEMENTARY FIGURES

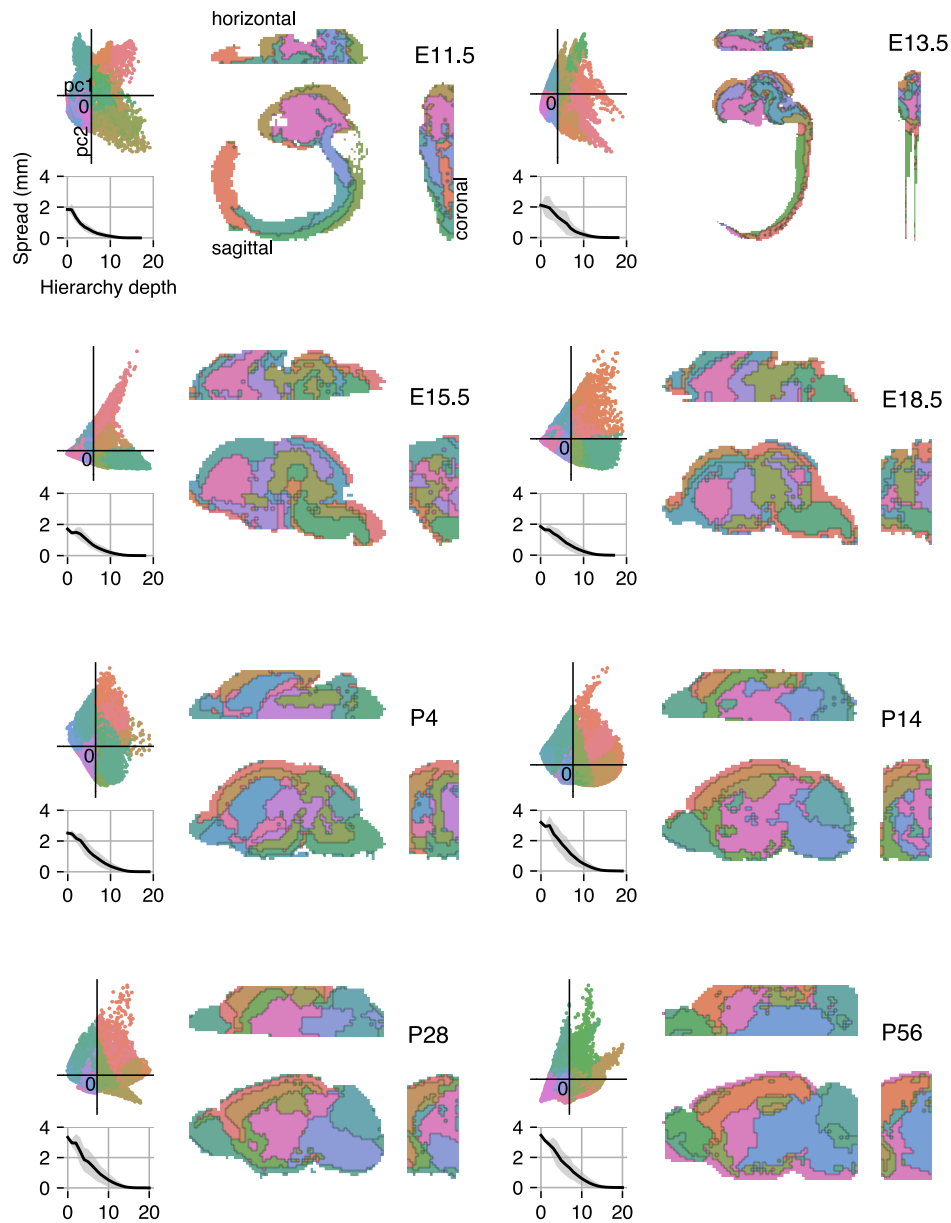

---

*B SUPPLEMENTARY FIGURES*

Figure S11: Hierarchical decomposition, as in Figure 5, but for all available time points. Only depth 3—the lowest tile in Figure 5—is shown, but other depths can be inferred by grouping similar colors. Decompositions were performed independently of one another (unlike Figure 6, where established hierarchies are projected across time points). The spatial spread of hierarchical regions goes down with hierarchy depth at each measured time point.

B SUPPLEMENTARY FIGURES

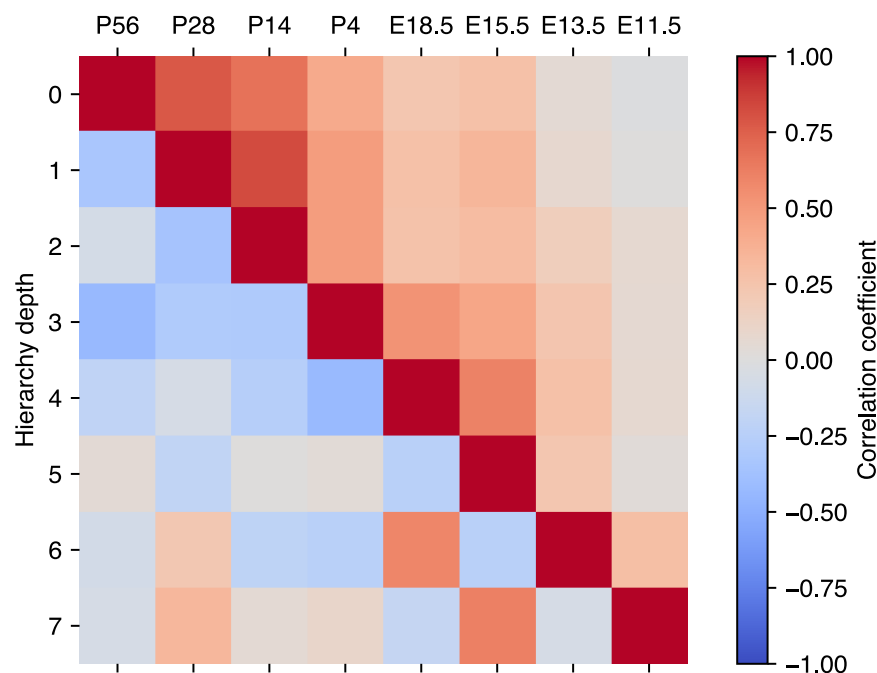

Figure S12: Asymmetry profiles identifying regions of the hierarchical decomposition are poorly correlated within the hierarchy, but correlated across time points. **Upper triangle** Pairwise correlation coefficient between the estimated asymmetries  $\vec{Cov}$  measured at the root of the hierarchies at various time points. Although the asymmetry measurement is done independently at each time point, the main direction of covariance across all voxels is correlated. Generally, nearby time points are more correlated than distant time points. This correlation is surprising a priori, because the absolute gene expression changes from E11.5 to P56. **Lower triangle** Pairwise correlation coefficient between the estimated asymmetries  $\vec{Cov}$  at the root of a hierarchy and other asymmetries within the same hierarchy. (Each column represents a time point, and each row a depth of the hierarchy, with the root at zero depth.) In contrast to standard principal component analysis, orthogonality between components is not enforced by our hierarchical decomposition. Nevertheless, we find that many pairs of components are poorly correlated. This implies that the direction of strongest covariance is not along any single direction for all subsets of voxels, but is rotated in high-dimensional expression space at each iteration of the decomposition. The model assumes that differential gene expression vectors  $\delta$ , and consequently the asymmetries  $\hat{\Delta}$  are independent. This matches the observation in the experimental data that the successive  $\vec{Cov}_i$  are poorly correlated in expression space. The poor correlation is not by construction, because unlike PCA (Principal Component Analysis), orthogonality is not enforced by our decomposition.

B SUPPLEMENTARY FIGURES

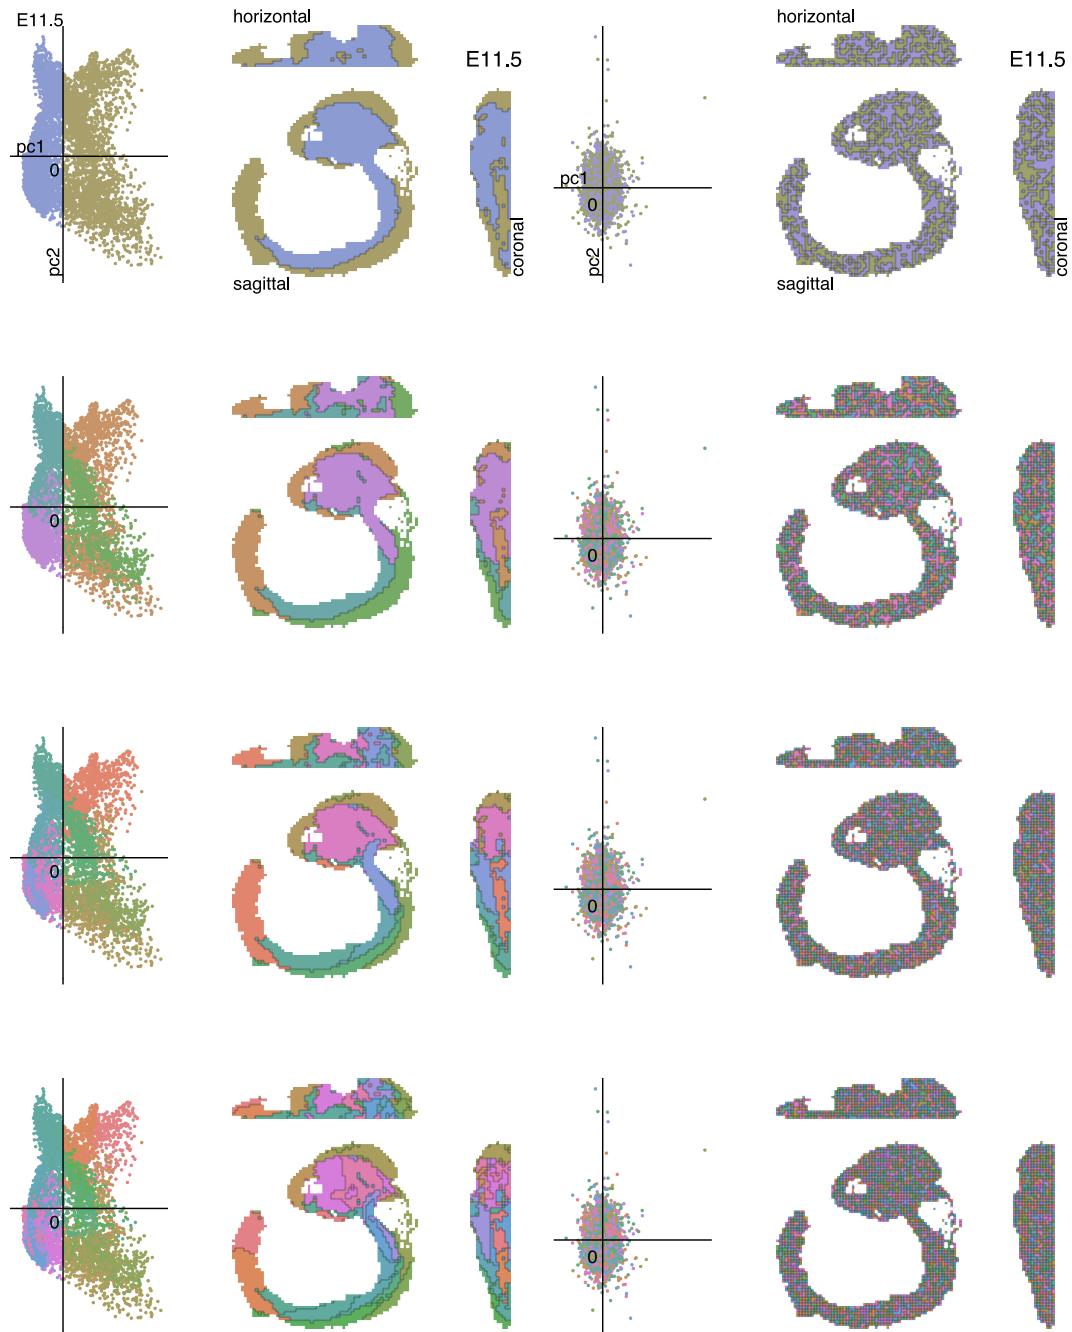

Figure S13: Hierarchical decomposition at E11.5. Analysis and depiction as in Figure 5. Bottom right matrix shows pairwise correlation coefficient among components within the hierarchy at the displayed depths. (Similar to the bottom triangle in Figure S12.)

B SUPPLEMENTARY FIGURES

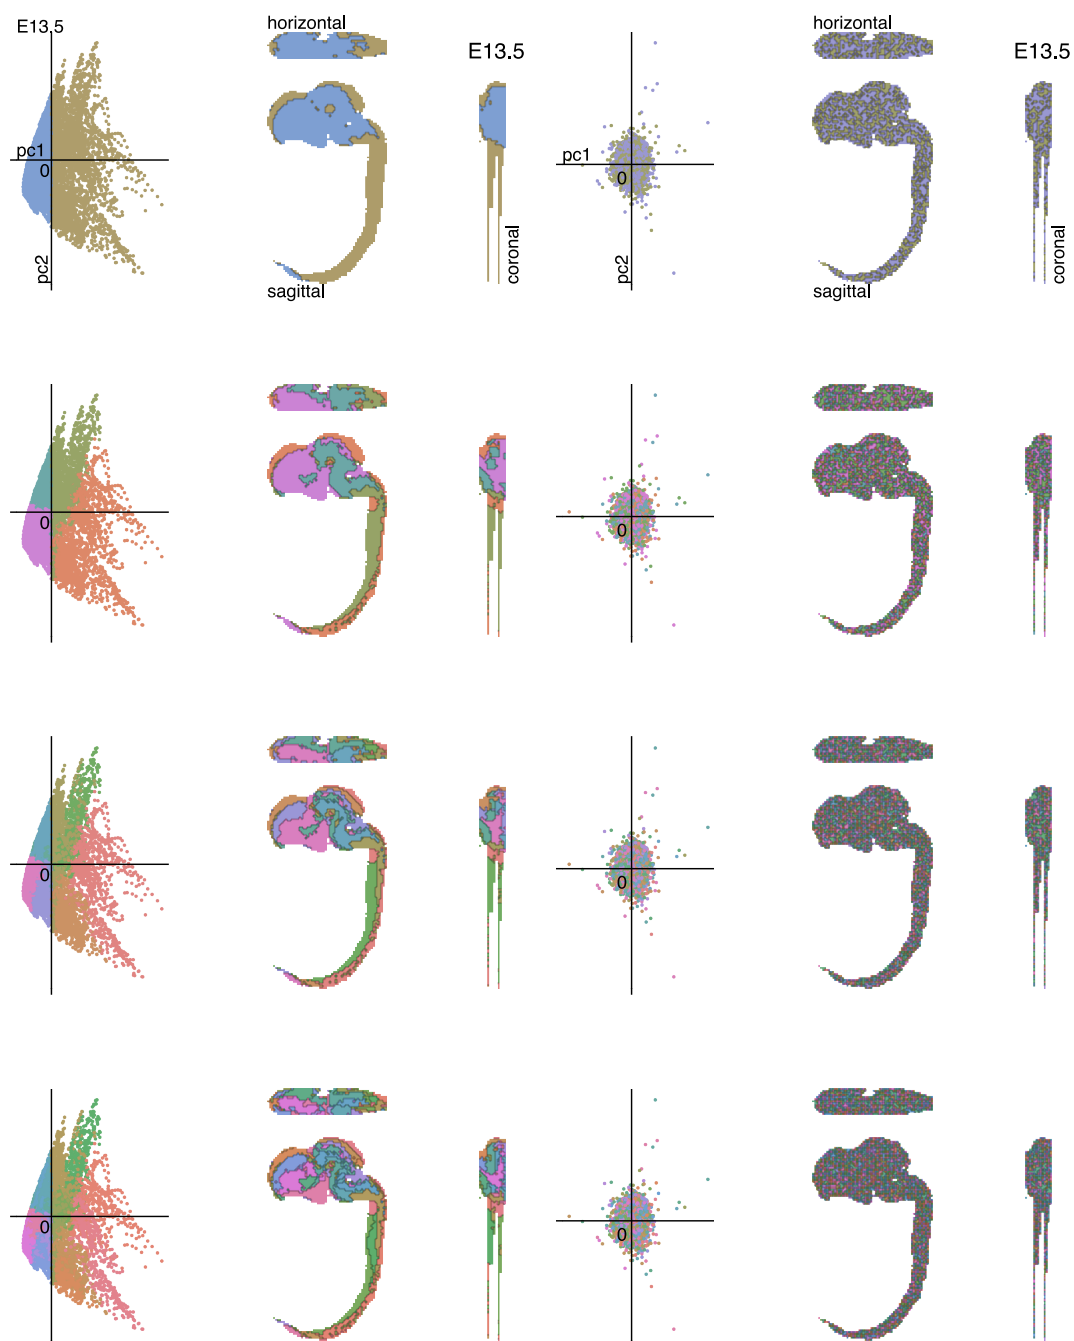

Figure S14: Hierarchical decomposition at E13.5. Analysis and depiction as in Figure 5. Bottom right matrix shows pairwise correlation coefficient among components within the hierarchy at the displayed depths. (Similar to the bottom triangle in Figure S12.)

B SUPPLEMENTARY FIGURES

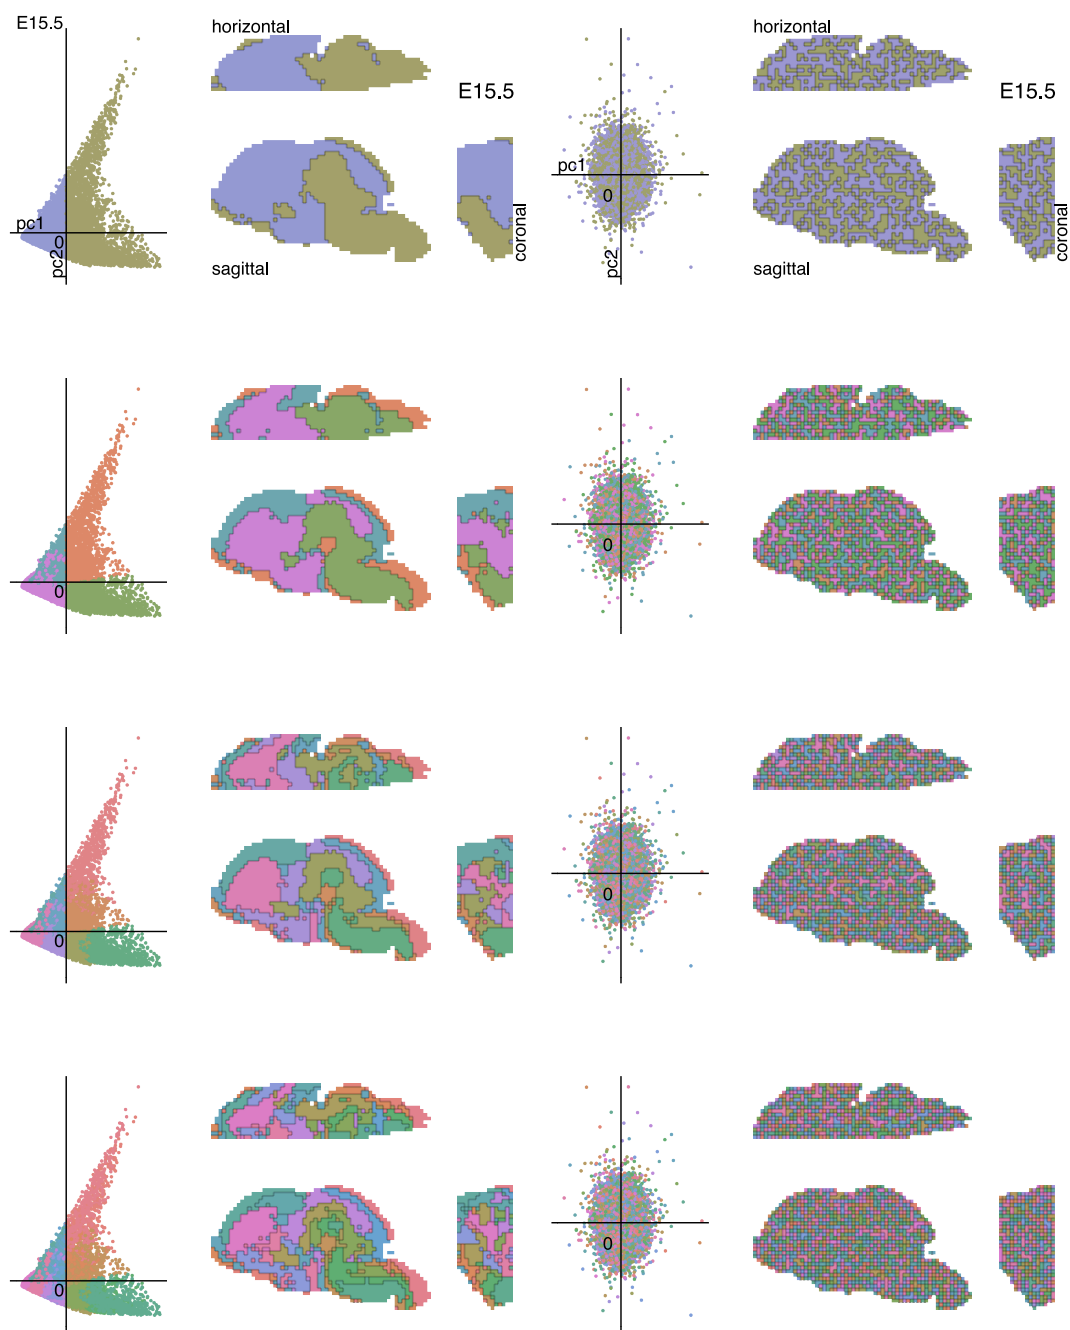

Figure S15: Hierarchical decomposition at E15.5. Analysis and depiction as in Figure 5. Bottom right matrix shows pairwise correlation coefficient among components within the hierarchy at the displayed depths. (Similar to the bottom triangle in Figure S12.)

B SUPPLEMENTARY FIGURES

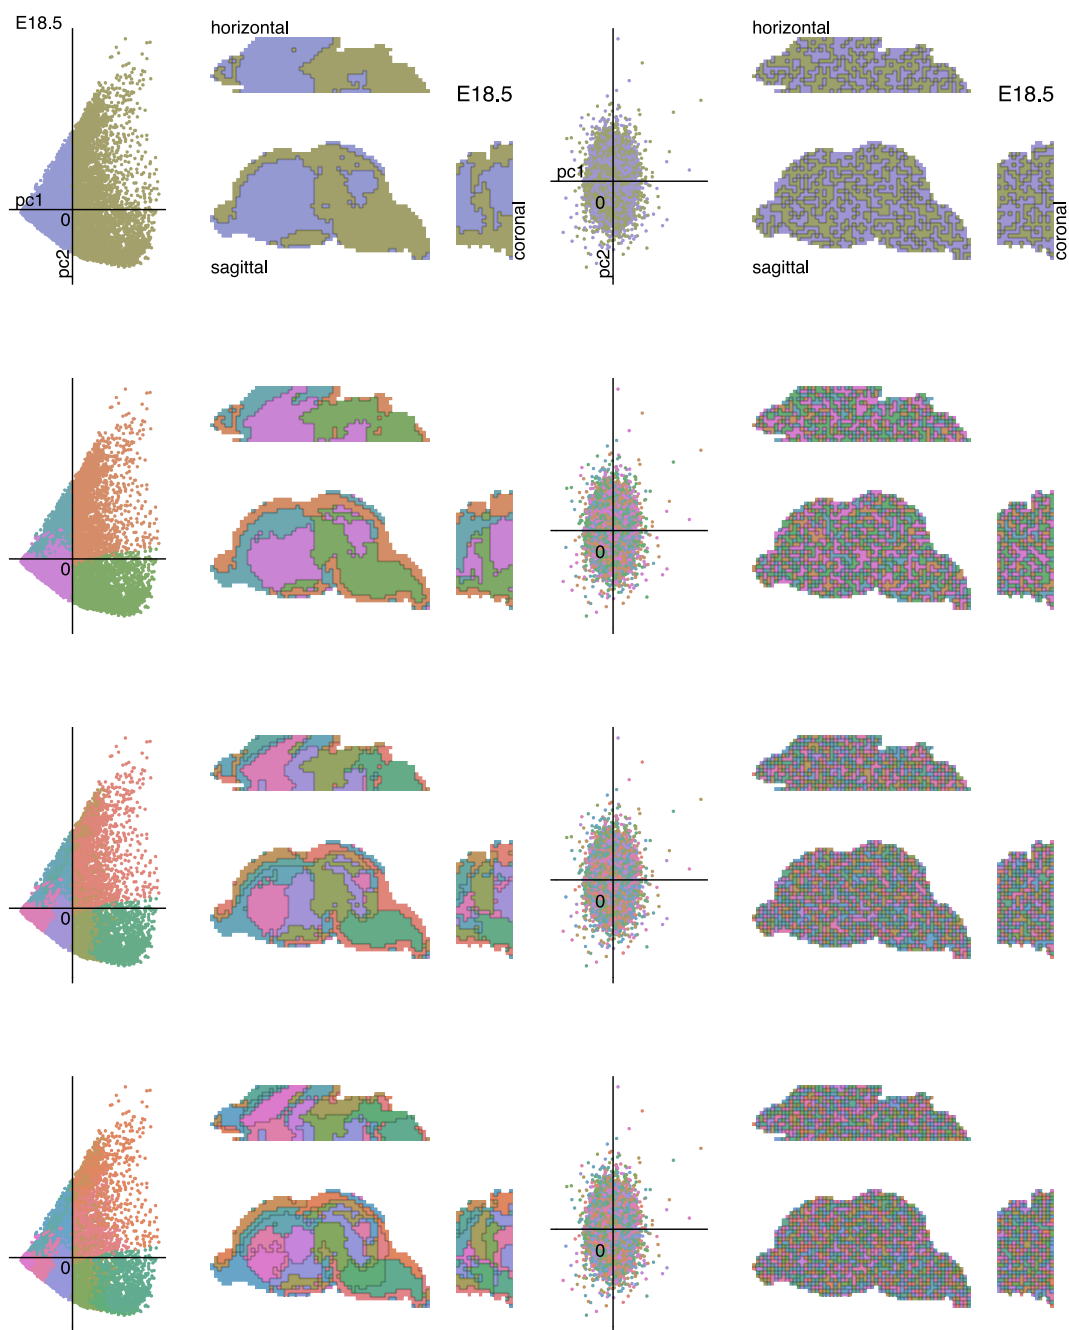

Figure S16: Hierarchical decomposition at E18.5. Analysis and depiction as in Figure 5. Bottom right matrix shows pairwise correlation coefficient among components within the hierarchy at the displayed depths. (Similar to the bottom triangle in Figure S12.)

B SUPPLEMENTARY FIGURES

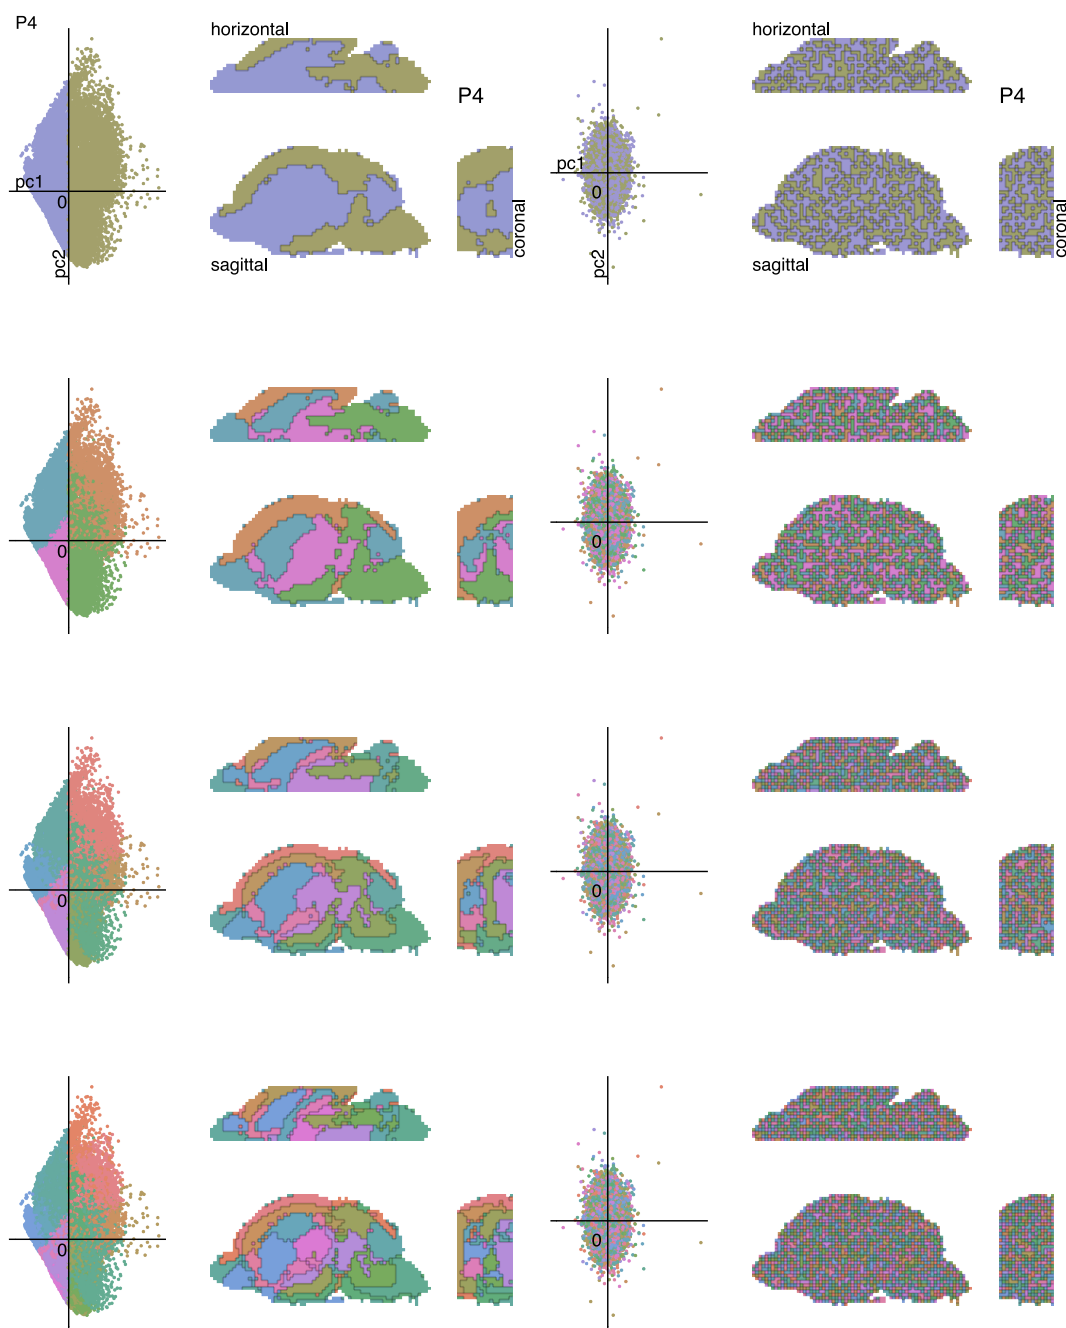

Figure S17: Hierarchical decomposition at P4. Analysis and depiction as in Figure 5. Bottom right matrix shows pairwise correlation coefficient among components within the hierarchy at the displayed depths. (Similar to the bottom triangle in Figure S12.)



B SUPPLEMENTARY FIGURES

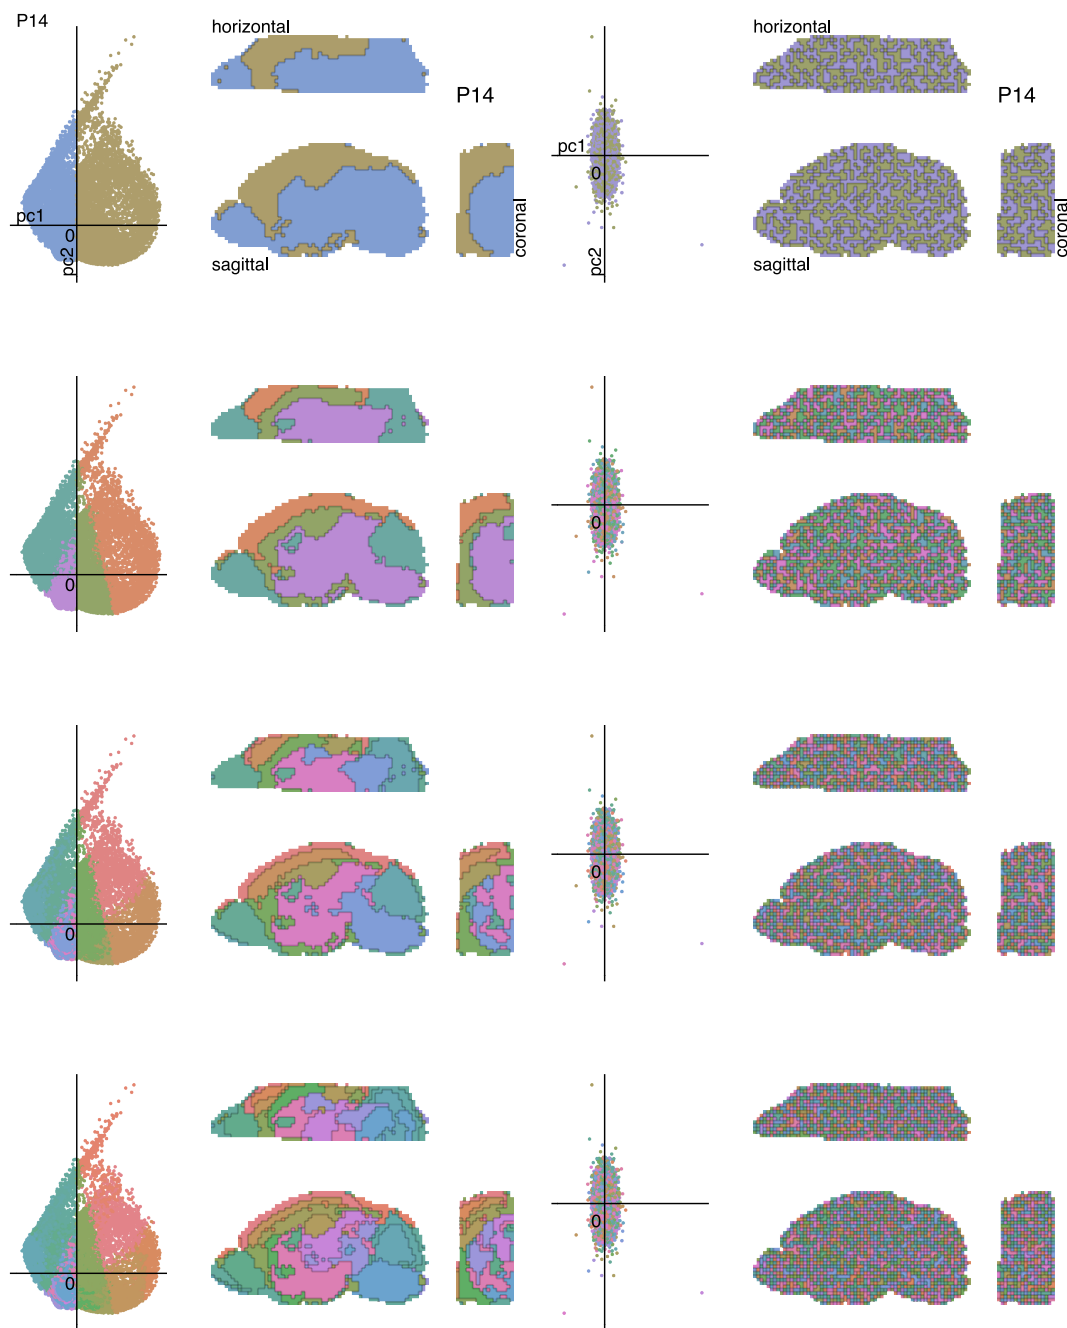

Figure S18: Hierarchical decomposition at P14. Analysis and depiction as in Figure 5. Bottom right matrix shows pairwise correlation coefficient among components within the hierarchy at the displayed depths. (Similar to the bottom triangle in Figure S12.)

B SUPPLEMENTARY FIGURES

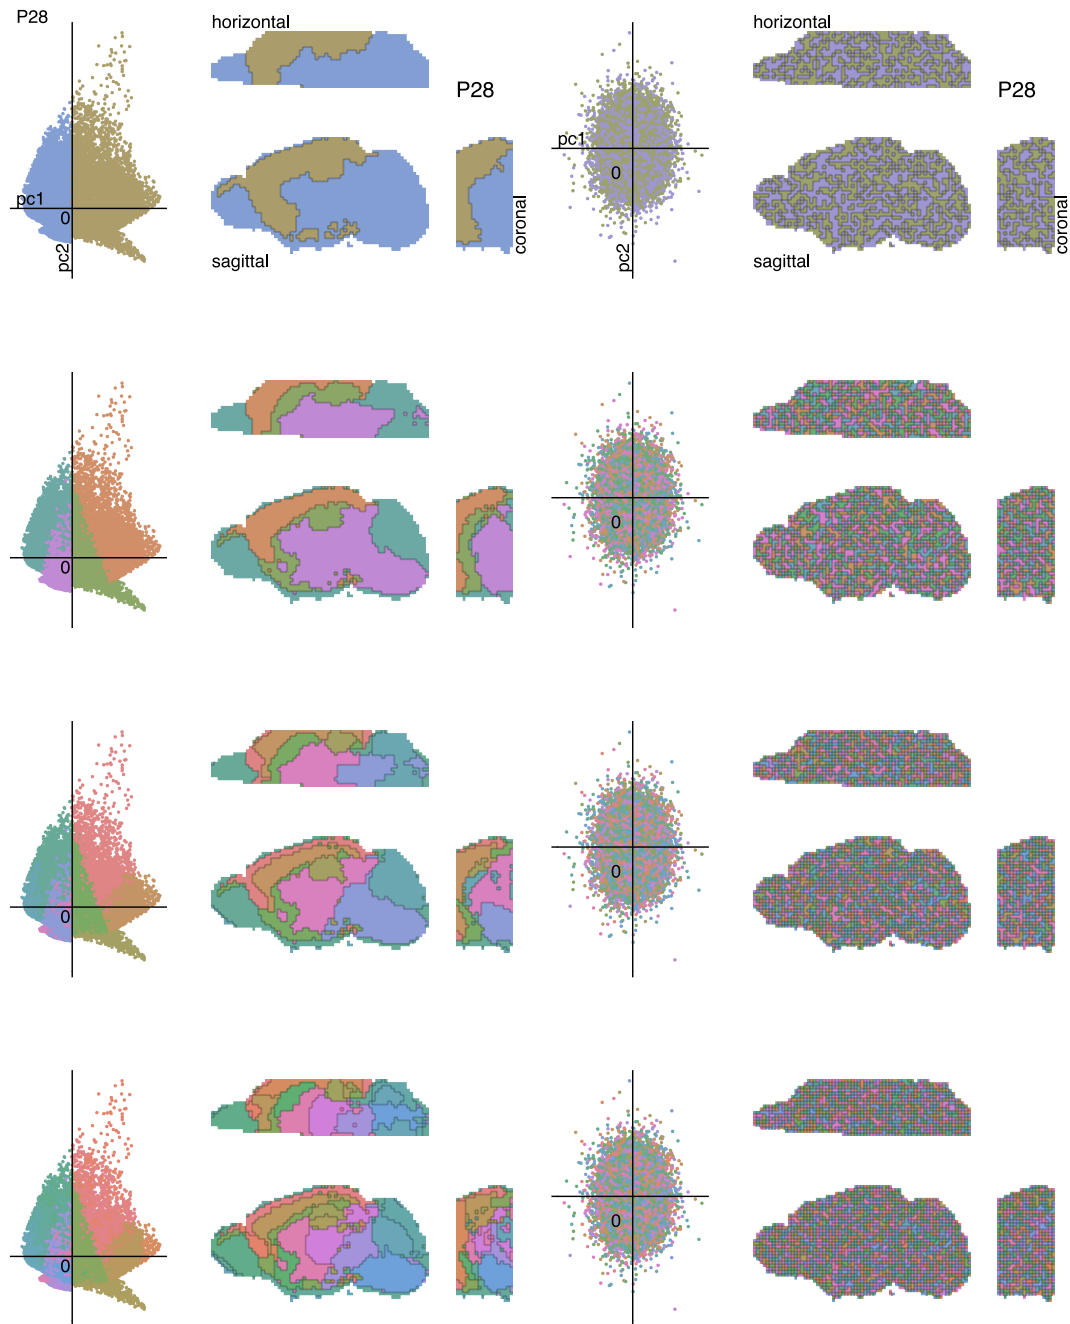

Figure S19: Hierarchical decomposition at P28. Analysis and depiction as in Figure 5. Bottom right matrix shows pairwise correlation coefficient among components within the hierarchy at the displayed depths. (Similar to the bottom triangle in Figure S12.)

B SUPPLEMENTARY FIGURES

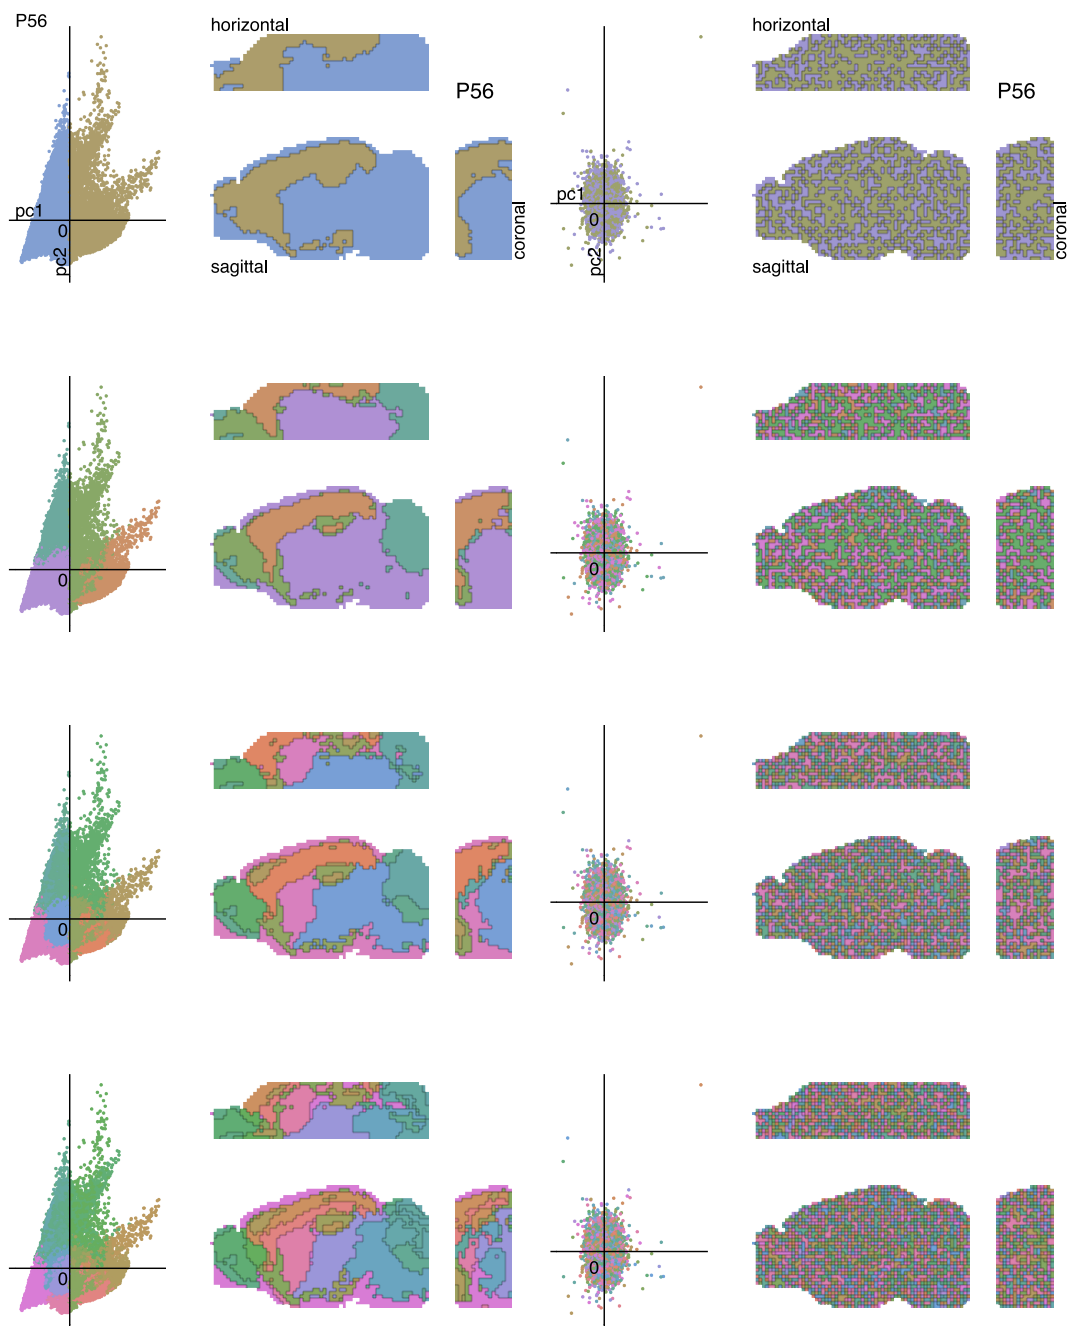

Figure S20: Hierarchical decomposition at P56. Analysis and depiction as in Figure 5. Bottom right matrix shows pairwise correlation coefficient among components within the hierarchy at the displayed depths. (Similar to the bottom triangle in Figure S12.)
